1 **Full Title:** The spatial-temporal effect of air pollution on GP visits and hospital admissions  
2 by ethnicity in the United Kingdom: An individual-level analysis

3 **Short Title:** Air pollution, GP visits, and hospital admissions

4

5 Mary Abed Al Ahad<sup>1</sup>

6

7 <sup>1</sup> School of Geography and Sustainable Development, University of St Andrews, Scotland,  
8 United Kingdom.

9

10

11

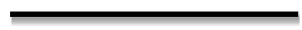

12 **Correspondence should be addressed to**

13 Mary Abed Al Ahad

14 School of Geography and Sustainable Development,

15 University of St Andrews,

16 Scotland, United Kingdom

17 Email: [maaal@st-andrews.ac.uk](mailto:maaal@st-andrews.ac.uk)

18

19

20

21

22

23

24

25

26

27

28

29

30

31

32

33 **Abstract**

34 **Background:** Air pollution has been associated with increased rates of hospital admissions  
35 and general-practitioner (GP) visits. Yet, more research is to be done to reveal the spatial-  
36 temporal dimension of this association and whether ethnic minorities experience greater effects  
37 from exposure to air pollution compared to the rest of population. This study investigates the  
38 spatial-temporal effect of air pollution on GP visits and hospital admissions by ethnicity in the  
39 United-Kingdom (UK).

40 **Methods:** We used individual-level longitudinal data from the “UK Household Longitudinal  
41 Study” including 46,442 adult individuals who provided 140,466 responses across five years  
42 (2015-2019). This data was linked to yearly concentrations of NO<sub>2</sub>, SO<sub>2</sub>, and particulate-matter  
43 (PM<sub>10</sub>, PM<sub>2.5</sub>) pollution using the Lower-Super-Output-Area (LSOA) of residence for each  
44 individual. We distinguished between spatial (*between* areas) and temporal (across time *within*  
45 each area) effects of air pollution on GP visits and hospital admissions and we used multilevel  
46 mixed-effects ordered logistic models for analysis.

47 **Results:** Results showed higher odds of outpatient hospital admissions with increasing  
48 concentrations of NO<sub>2</sub> (OR=1.009; 95%CI=1.006-1.013), SO<sub>2</sub> (OR=1.063; 95%CI=1.030-  
49 1.097), PM<sub>10</sub> (OR=1.013; 95%CI=1.006-1.021), and PM<sub>2.5</sub> (OR=1.022; 95%CI=1.012-  
50 1.032) pollutants. Higher odds of GP visits were also observed with increasing concentrations  
51 of NO<sub>2</sub> (OR=1.011; 95%CI=1.007-1.015) and SO<sub>2</sub> (OR=1.123; 95%CI=1.087-1.160)  
52 pollutants. Decomposing air pollution into *between* (spatial: across LSOAs) and *within*  
53 (temporal: across years within each LSOA) effects, showed significant *between* effects for air  
54 pollution on GP visits and hospital admissions, but not *within* effects. We observed no  
55 differences between ethnic minorities and British-white for the association between air  
56 pollution and hospital admissions and GP visits.

57 **Conclusion:** Using individual-level longitudinal data, our study supports the presence of a  
58 spatial-temporal association between air pollution and hospital admissions and GP visits.  
59 However, ethnic minorities do not seem to experience greater health-related effects from  
60 exposure to air pollution compared to the rest of population.

61

62

63 **Keywords:** Air pollution, GP visits, hospital admissions, ethnicity, spatial-temporal,  
64 longitudinal, United-Kingdom.

65

66

67

68

69

70

## 71        **1. Introduction**

72        Less than one year ago (31st October-12th November 2021), world leaders gathered at the  
73        COP26 in Glasgow-Scotland to tackle the issue of climate change with air pollution being one  
74        of its core elements and its consequences on humans' health and planetary wellbeing. The  
75        association of air pollution with morbidity and mortality is well-documented in epidemiologic  
76        and environmental health studies which examine mild to severe outcomes including self-rated  
77        general health, doctor or general-practitioner (GP) visits, and hospital admissions, in particular  
78        those related to cancer, cardiovascular and respiratory health problems (1-4). Nevertheless,  
79        most of this research is concentrated on the health impacts of exposure to nitrogen dioxide  
80        (NO<sub>2</sub>), particulate matter with diameter of less than 10 µm (PM10) and particulate matter with  
81        diameter of less than 2.5 µm (PM2.5) pollution (2, 5). For example, in Lisbon-Portugal, higher  
82        rates of hospital admissions for circulatory and respiratory diseases were observed with higher  
83        concentrations of carbon monoxide, NO<sub>2</sub>, PM10 and PM2.5 pollutants (6). In New England, a  
84        0.7% and a 4.2% increase in respiratory hospital admissions were noted for every 10 µg/m<sup>3</sup>  
85        increase in short-term and long-term PM2.5 exposure, respectively (7). In Switzerland, doctor  
86        visits for chronic obstructive pulmonary diseases (COPD) and chronic bronchitis increased by  
87        9.1% and 4.2%, respectively, with every 10 µg/m<sup>3</sup> increase in NO<sub>2</sub> pollutant (8). This  
88        highlights the need for studies that investigate the effect of other air pollutants (e.g. Sulphur  
89        dioxide [SO<sub>2</sub>]) on health-related outcomes (2).

90        Furthermore, the association between air pollution and health is not direct and several factors  
91        play a role in shaping this association. These factors include: (1) socioeconomic (e.g. age,  
92        gender, deprivation, income, socioeconomic classification, education, occupation, and  
93        economic activity) (2, 9-12); (2) individual and life-style (e.g. pre-existing diseases, cigarette  
94        smoking, alcohol drinking, physical exercise, and obesity) (13-16); (3) contextual (e.g.  
95        neighbourhood conditions, area-level multiple deprivation index, rural-urban classifications,

96 and population density) (12, 17, 18); and (4) environmental (e.g. season, temperature, relative  
97 humidity, altitude, rainfall and wind) (19-21).

98 Despite the documented evidence about the factors affecting the association between air  
99 pollution and morbidity and mortality, published studies from Europe are mainly concentrated  
100 on assessing the differential effect of air pollution on health-related outcomes by gender, age,  
101 and socioeconomic status groupings, neglecting other key demographic sub-groups such as  
102 ethnicity (2). Ethnicity and country of birth are two important socio-demographic factors that  
103 affect individuals' health (22, 23), and possibly lead to disparities in the effect of air pollution  
104 on hospital admissions and GP visits. Such ethnic disparities could be related to differences in  
105 the socioeconomic status (e.g. the relatively lower socioeconomic status for ethnic minorities),  
106 residential contexts (e.g. residing in more deprived neighbourhoods with inadequate housing  
107 conditions), exposure to ambient air pollution, or the differential effect of pollution by ethnicity  
108 (23-25). Thus, despite the "*Healthy migrant effect*", which describes the advantageous  
109 characteristics (e.g. healthier, wealthier, and more educated) of immigrants (non-UK-born  
110 individuals) (26, 27), we expect ethnic minorities and non-UK-born individuals to show higher  
111 rates of hospital admissions and GP visits with increasing concentrations of air pollution. It  
112 should be noted, however, that literature on the effect of air pollution on health by ethnicity  
113 exist but is mainly focused around North America (28-30), which is characterised by a different  
114 ethnic composition to that in Europe.

115 In addition to the aforementioned literature gap, there is lack of research on the spatial-temporal  
116 effect of air pollution exposure on hospital admissions and GP visits using a *between-within*  
117 longitudinal design. The *between-within* design decomposes the overall effect of air pollution  
118 on hospital admissions and GP visits into *between* and *within* effects. The *Between* (spatial)  
119 effect assesses the effect of average air pollution concentrations across the follow-up time on

120 hospital admissions and GP visits between geographical areas (e.g. census output areas) while  
121 the *within* effect (temporal) assesses the effect of the yearly deviation in air pollution  
122 concentrations from the average concentration on hospital admissions and GP visits across time  
123 within each geographical area (31). The benefits of the *between-within* approach is that it  
124 controls for data endogeneity and the effect of omitted confounders by allowing a time-varying  
125 geographical-fixed analysis (32); thus, providing detailed spatial-temporal evidence for  
126 policymaking decisions.

127 Considering the above-discussed literature gaps, this study utilises longitudinal individual-  
128 level data to investigate the spatial-temporal effect of air pollution on GP visits and hospital  
129 admissions by ethnicity in the UK. We aim specifically (1) to address the overall and the  
130 *between* (spatial-*between* geographical areas) and *within* (temporal-across time *within* each  
131 geographical area) effects of four air pollutants (NO<sub>2</sub>, SO<sub>2</sub>, PM10, and PM2.5) on hospital  
132 admissions and GP visits; and 2) to assess whether the association between air pollution and  
133 hospital admissions and GP visits varies between ethnic groups and by country of birth (non-  
134 UK-born versus UK-born).

135  
136

## 2. Methods

### 2.1. Study design and population

138 We used longitudinal individual-level data from the “*Understanding Society: The UK*  
139 *Household Longitudinal Study (UKHLS)*” (33). This is a rich dataset, which consists of 10 data  
140 collection waves from 2009 to 2020 with around 40,000 households recruited at wave 1 from  
141 the four nations of the UK: England, Wales, Scotland, and Northern Ireland. It involves two  
142 main surveys: the youth survey which is filled by young people (aged 10 to 15) and the adult  
143 survey which is filled by individuals aged 16 and above (33).

144 The UKHLS dataset includes information on the socioeconomic characteristics of individuals  
145 including age, gender, marital status, education, occupation, socioeconomic classification,  
146 perceived financial situation, ethnicity, and country of birth and on the individuals' self-rated  
147 health, wellbeing, hospital admissions, GP visits, smoking status, and the local authority and  
148 lower super output areas (LSOAs) of residence. Individuals recruited in the UKHLS are visited  
149 on a yearly basis to collect information on changes to their household and individual  
150 circumstances (33). Further information on the UKHLS dataset is described elsewhere (34-36).  
151 For this study, we utilized individual-level data from the adult survey (age: 16+) of the UKHLS  
152 on 46,442 adult individuals who provided a total of 140,466 responses across four data  
153 collection waves (waves 7-10) over five years (2015-2019). We only used data from waves 7-  
154 10 of the UKHLS adult survey due to the unavailability of data on hospital admissions and GP  
155 visits in the earlier waves. We have to also note that the initial adult survey of the UKHLS for  
156 waves 7-10 involved a total of 49,028 individuals with 151,834 surveys and that 11,368 surveys  
157 were omitted due to the reasons described in Fig 1.

158 Fig 1: The reasons for omitting survey responses from the UKHLS (waves 7-10) data

159

## 160 **2.2. Variables and measurements**

161

### 162 **2.2.1. Outcome variables**

163 *GP visits* and *outpatient hospital admissions* were measured as ordinal variables by asking  
164 individuals on the number of times they visited a GP or went to a hospital/clinic as outpatients  
165 in the past 12 months preceding the data collection date as follows: 0=none, 1=one to two  
166 times, 2=three to five times, 3=six to ten times, and 4=more than ten times.

### 167 **2.2.2. Air pollution**

168 We downloaded yearly air pollution data that combine all sources of air pollution including  
169 road traffic and industrial/combustion processes for NO<sub>2</sub>, SO<sub>2</sub>, PM10, and PM2.5 pollutants

170 from the “Department for Environment Food and Rural Affairs” online database (37). These  
171 are raster data of mean annual concentrations of pollutants measured in  $\mu\text{g}/\text{m}^3$  up to the year  
172 of 2019, estimated using air dispersion modelling (Pollution Climate Mapping) at a spatial  
173 resolution of 1x1 km and projected using the UK National Grid (37).

174 This 1x1 km raster air pollution data were linked to the UKHLS data using the Lower Super  
175 Output Areas (LSOAs; data zones for Scotland and Super Output Areas for Northern Ireland)  
176 of residence for each individual and each year (2015-2019). LSOAs are used to decompose  
177 England and Wales based on the population size into areas with a minimum population size of  
178 1000 people and are the lowest level of geography offered by the UKHLS dataset. Some  
179 LSOAs, especially those located in urbanised areas, have an area of less than 1x1 km, which  
180 offers high spatial resolution to assess the impact of air pollution on hospital admissions and  
181 GP visits. The LSOAs in England and Wales are equivalent to data zones in Scotland and to  
182 Super Output Areas in Northern Ireland. For simplicity we refer to the joint LSOAs, data zones,  
183 and Super Output Areas as LSOAs. The linkage was done by computing the average air  
184 pollution concentration for each LSOA from all the 1x1 km raster squares that intersected with  
185 the respective LSOA. For example, if a certain LSOA intersected with only one raster square,  
186 it is given the value of air pollution of that square and if a certain LSOA intersected with two  
187 raster squares, it is given the average air pollution of those two squares, and so on so forth.

### 188 **2.2.3. Socioeconomic and lifestyle covariates**

189 For this study, we selected a number of individual-level socioeconomic and lifestyle covariates  
190 based on what is available in the UKHLS dataset and based on the confounders and effect  
191 modifiers considered by relevant literature (1, 2). These included gender (1=male; 2=female);  
192 age (coded as 16-18 and then in 5 years increments as 19-23; 24-28; 29-33; 34-38; 39-43; 44-  
193 48; 49-53; 54-58; 59-63; 64-68; 69-73; 74-78; >78); ethnicity (1=British-white;

194 2=Other-white; 3=Indian; 4=Pakistani/Bangladeshi; 5=Black/African/Caribbean; 6=mixed  
195 ethnicities; 7=Other ethnicities); country of birth (1=born in UK; 2=not born in UK; 3=No  
196 answer); marital status (1=married; 2=living as a couple; 3=widowed; 4=divorced/separated;  
197 5=single never married; 6=no answer); education (1=university degree; 2=high school degree;  
198 3=lower educational levels; 4=other qualifications; 5=still a student); perceived financial  
199 situation (1=living comfortably/doing alright; 2=living difficultly; 3=no answer);  
200 socioeconomic classification (1=management and professionals occupations; 2=intermediate  
201 occupations; 3=routine occupations; 4=not applicable: Student/retired/Not working; 5=no  
202 answer); and smoking status (0=non-smoker; 1=smoker; 2=no answer).

203 Finally, year dummies (calendar year: 2015-2019) were considered as a control for the time  
204 trend in our analysis following the approach of relevant studies (38, 39). Given that our study  
205 utilises yearly air pollution data, controlling for other temporal covariates considered by  
206 relevant literature such as seasonal trends (40, 41) was not possible.

### 207 **2.3. Data analysis**

208 Percentages were computed to describe the GP visits, hospital admissions, and individuals'  
209 socioeconomic and lifestyle covariates for each wave (waves 7-10) of the UKHLS sample. We  
210 also examined the correlation between NO<sub>2</sub>, SO<sub>2</sub>, PM<sub>10</sub>, and PM<sub>2.5</sub> pollutants at the LSOAs  
211 level using Pearson's correlation coefficient. Given the high observed correlations between the  
212 pollutants (Pearson's coefficient  $\geq 0.7$  (42); Table 2), the association of NO<sub>2</sub>, SO<sub>2</sub>, PM<sub>10</sub>, and  
213 PM<sub>2.5</sub> pollutants with GP visits and hospital admissions was examined in separate regression  
214 models.

215 To account for the study design which involves linkages of air pollution to individual-level  
216 data at the LSOAs level and to account for the repeated individuals' responses across time, the  
217 association of the GP visits and outpatient hospital admission ordinal outcomes with each of



218 NO<sub>2</sub>, SO<sub>2</sub>, PM<sub>10</sub>, and PM<sub>2.5</sub> pollutants was assessed using three-levels (repeated individual  
219 responses across time nested within LSOAs) mixed-effects ordered logistic models. These  
220 models were adjusted for the socioeconomic and lifestyle covariates and the year (2015-2019)  
221 dummies. In a supplementary analysis, we also demonstrate the association of GP visits and  
222 hospital admissions with each of the socioeconomic and lifestyle covariates (Appendix: Tables  
223 A1 and A2).

224 In further analysis, we decomposed the overall effect of air pollution (linked at the LSOAs  
225 level) on GP visits and outpatient hospital admissions into *between (spatial)* and *within*  
226 *(temporal)* effects. *Between* effects were used to determine the *spatial* effect of air pollution by  
227 computing the mean of air pollution across the five years of follow-up (2015-2019) for each  
228 LSOA. In contrast, *within* effects were used to determine the *temporal* effect of air pollution  
229 by calculating the yearly air pollution deviation from the five years mean for each LSOA.  
230 Therefore, the multilevel mixed-effects ordered logistic models were used to examine the  
231 overall (equation 1) effect of air pollution as well as the *between* and *within* effects (equation  
232 2) of air pollution on GP visits and outpatient hospital admissions.

$$233 \log\left(\frac{Y_{tij}^{(s)}}{1 - Y_{tij}^{(s)}}\right) = \beta_0^{(s)} + U_{0ij} + U_{0j} + \beta_1 \text{overall pollutant concentration}_{tij} + \beta_2 \text{Age}_{tij} + \beta_3 \text{Gender}_{tij} +$$

234 (1)

$$235 \log\left(\frac{Y_{tij}^{(s)}}{1 - Y_{tij}^{(s)}}\right) = \beta_0^{(s)} + U_{0ij} + U_{0j} + \beta_1 \text{Between pollutant concentration}_{tij} + \beta_2 \text{Within pollutant con}$$

236 (2)

237  
238 Where  $Y_{ij}$  is the outcome (GP visits or outpatient hospital admissions) for individual  $i$ , in LSOA  
239  $j$  at year  $t$ ;  $s$  is the level of an ordered category with  $s$  levels for GP visits or hospital admission  
240 outcomes;  $\beta_1, \beta_2, \dots, \beta_{12}$  are the slopes of fixed effects;  $\beta_0$  is the fixed intercept;  $U_{0ij}$  is level 2  
241 random intercept of individuals nested in LSOAs;  $U_{0j}$  is level 3 random intercept of LSOAs;

242 Between pollutant concentration $_{tij} = \overline{\text{overall pollutant concentration}_j}$ ;

243 Within pollutant concentration $_{tij} = |\overline{\text{overall pollutant concentration}_j} -$   
244 overall pollutant concentration $_{tj}|$ .

245 Finally, we incorporated into the multilevel ordered logistic models an interaction term  
246 between ethnicity and each of NO<sub>2</sub>, SO<sub>2</sub>, PM10, and PM2.5 pollutants and between country of  
247 birth and each of the four pollutants to assess whether the association between air pollution and  
248 GP visits and hospital admissions varies between ethnic groups and by country of birth.  
249 Interaction terms were incorporated into the overall pollutant models and into the *between-*  
250 *within* models, each at a time. Coefficient plots were used to visualize the interaction analysis  
251 odds ratios.

252 Statistical analysis was conducted using STATA software (StataCorp. 2015. Stata Statistical  
253 Software: Release 14. College Station, TX: StataCorp LP) and spatial pre-processing was  
254 conducted using ArcGIS Pro software. Regression results were reported in terms of odds ratios  
255 (ORs) and 95% confidence intervals (CIs) per 1 µg/m<sup>3</sup> increase in the air pollutants. Statistical  
256 significance was considered at a P-value of less than 0.05.

#### 257 **2.4. Ethical considerations**

258 This paper was granted ethical approval on the 14th of May 2020 by the author's affiliated  
259 institution (School of Geography and Sustainable Development Ethics Committee, acting on  
260 behalf of the University Teaching and Research Ethics Committee (UTREC) at the University  
261 of St Andrews). The paper uses secondary adult (age 16+) fully anonymised data from the  
262 "Understanding Society: The UK Household Longitudinal Study (UKHLS)" and authors did  
263 not have access to potentially identifying information; thus, obtaining participants' informed  
264 consent is not applicable and was waved by the authors' institution ethics committee. The  
265 University of Essex responsible for the UKHLS data collection and management has already

266 obtained written informed consent from all the study participants (33). Requesting consent for  
 267 health record linkage was approved at Wave 1 by the National Research Ethics Service (NRES)  
 268 Oxfordshire REC A (08/H0604/124), and at Wave 4 by NRES Southampton REC A  
 269 (11/SC/0274). Approval for the collection of biosocial data by trained nurses in Waves 2 and  
 270 3 of the main survey was obtained from the National Research Ethics Service (Understanding  
 271 Society - UK Household Longitudinal Study: A Biosocial Component, Oxfordshire A REC,  
 272 Reference: 10/H0604/2).

### 273 3. Results

#### 274 3.1. Description of GP visits, hospital admissions and individuals' 275 socioeconomic and lifestyle covariates

276 In all the four waves, most of the individuals visited a GP one to two times, did not go to a  
 277 hospital as outpatients, were females, aged between 34 and 58 years old, had British-white  
 278 ethnicity, were born in the UK, were married, had a university degree or other educational  
 279 qualifications, reported a comfortable/alright financial situation, had a managerial or  
 280 professional socioeconomic classification (if working), were non-smokers, and lived in  
 281 England (Table 1).

282

283

284

285 Table 1: Description of GP visits, outpatient hospital admissions and individual's  
 286 socioeconomic and lifestyle covariates for each wave of the UKHLS sample (N=140,466  
 287 surveys from 46,442 individuals)

|                  |                  | <b>Wave7<br/>(2015-2017)</b> | <b>Wave8<br/>(2016-2018)</b> | <b>Wave9<br/>(2017-2019)</b> | <b>Wave10<br/>(2018-2019)</b> |
|------------------|------------------|------------------------------|------------------------------|------------------------------|-------------------------------|
|                  |                  | N=38,663                     | N=36,319                     | N=33,727                     | N=31,757                      |
|                  |                  | <b>Percent</b>               | <b>Percent</b>               | <b>Percent</b>               | <b>Percent</b>                |
| <b>GP visits</b> | None             | 26.7                         | 21.1                         | 21.2                         | 28.3                          |
|                  | One to two times | 37.0                         | 39.5                         | 40.8                         | 40.6                          |

|                                       |                                         |      |      |      |      |
|---------------------------------------|-----------------------------------------|------|------|------|------|
|                                       | Three to five times                     | 20.8 | 23.1 | 23.2 | 19.7 |
|                                       | Six to ten times                        | 8.5  | 9.3  | 9.1  | 6.8  |
|                                       | More than ten times                     | 7.0  | 6.9  | 5.7  | 4.7  |
| <b>Outpatient hospital admissions</b> | None                                    | 57.0 | 54.3 | 53.0 | 55.5 |
|                                       | One to two times                        | 25.1 | 27.3 | 28.0 | 27.4 |
|                                       | Three to five times                     | 10.1 | 10.7 | 11.5 | 10.3 |
|                                       | Six to ten times                        | 4.3  | 4.4  | 4.4  | 3.9  |
|                                       | More than ten times                     | 3.6  | 3.3  | 3.2  | 2.9  |
| <b>Gender</b>                         | Male                                    | 44.5 | 44.7 | 44.3 | 44.3 |
|                                       | Female                                  | 55.5 | 55.3 | 55.7 | 55.7 |
| <b>Age</b>                            | Young (<34)                             | 24.6 | 23.8 | 23.1 | 22.5 |
|                                       | Middle age (34-58)                      | 43.9 | 43.3 | 42.8 | 42.3 |
|                                       | Old (>58)                               | 31.5 | 32.9 | 34.1 | 35.3 |
| <b>Ethnicity</b>                      | British-white                           | 74.5 | 75.0 | 76.3 | 77.3 |
|                                       | Other-white                             | 5.7  | 5.6  | 5.4  | 5.2  |
|                                       | Indian                                  | 4.2  | 4.2  | 3.9  | 3.8  |
|                                       | Pakistani/Bangladeshi                   | 5.6  | 5.7  | 5.7  | 5.5  |
|                                       | Black/African/Caribbean                 | 4.8  | 4.5  | 4.0  | 3.6  |
|                                       | Mixed ethnicities                       | 1.8  | 1.9  | 1.8  | 1.8  |
|                                       | Other ethnicities                       | 3.3  | 3.3  | 2.9  | 2.8  |
| <b>Country of birth</b>               | Born in the UK                          | 65.6 | 66.4 | 67.3 | 68.1 |
|                                       | Not born in the UK                      | 15.9 | 15.1 | 14.0 | 13.0 |
|                                       | No answer                               | 18.5 | 18.5 | 18.7 | 18.9 |
| <b>Marital status</b>                 | Married                                 | 52.4 | 52.9 | 53.4 | 53.8 |
|                                       | Living as a couple                      | 10.5 | 10.2 | 9.8  | 9.6  |
|                                       | Widowed                                 | 6.0  | 6.0  | 6.1  | 6.0  |
|                                       | Divorced/separated                      | 7.9  | 7.7  | 7.9  | 7.9  |
|                                       | Single never married                    | 23.1 | 23.1 | 22.6 | 22.3 |
|                                       | No answer                               | 0.2  | 0.2  | 0.3  | 0.4  |
| <b>Education</b>                      | University degree                       | 30.1 | 31.0 | 31.9 | 33.1 |
|                                       | High school degree                      | 25.9 | 26.4 | 26.7 | 26.4 |
|                                       | Lower educational levels                | 1.0  | 1.0  | 1.0  | 1.0  |
|                                       | Other qualifications                    | 36.3 | 35.4 | 34.3 | 33.7 |
|                                       | Still a student                         | 6.7  | 6.2  | 6.0  | 5.8  |
| <b>Perceived financial situation</b>  | living comfortably/doing alright        | 71.7 | 72.4 | 70.7 | 71.1 |
|                                       | living difficultly                      | 28.1 | 27.3 | 28.9 | 28.5 |
|                                       | No answer                               | 0.2  | 0.3  | 0.4  | 0.4  |
| <b>Socio-economic classification</b>  | Management and professional occupations | 24.0 | 23.8 | 23.5 | 23.2 |
|                                       | Intermediate occupations                | 13.3 | 13.3 | 12.9 | 12.6 |
|                                       | Routine occupations                     | 19.7 | 18.9 | 18.3 | 17.4 |
|                                       | NA: student/retired/not working         | 42.4 | 43.0 | 43.1 | 43.9 |
|                                       | No answer                               | 0.6  | 1.0  | 2.2  | 2.9  |
| <b>Smoking status</b>                 | Non-smoker                              | 84.4 | 85.2 | 86.5 | 86.9 |
|                                       | Smoker                                  | 15.5 | 14.7 | 13.4 | 12.9 |
|                                       | No answer                               | 0.1  | 0.2  | 0.1  | 0.2  |
| <b>Nation</b>                         | England                                 | 79.0 | 78.9 | 78.5 | 78.4 |
|                                       | Wales                                   | 6.4  | 6.4  | 6.5  | 6.5  |
|                                       | Scotland                                | 8.3  | 8.3  | 8.4  | 8.5  |
|                                       | Northern Ireland                        | 6.3  | 6.4  | 6.6  | 6.7  |

289 **3.2. Description of air pollution**

290 A high correlation (Pearson’s coefficient  $\geq 0.7$ ) was observed between NO<sub>2</sub>, PM10, and PM2.5  
 291 pollutants, which could be explained by the chemical reactions between particulate matter and  
 292 NO<sub>2</sub> pollutants in the atmosphere. Across the five years of follow-up (2015-2019), the mean of  
 293 NO<sub>2</sub> was 14.05  $\mu\text{g}/\text{m}^3$  (SD=6.64), the mean of SO<sub>2</sub> was 1.44  $\mu\text{g}/\text{m}^3$  (SD=0.60), the mean of  
 294 PM10 was 13.37  $\mu\text{g}/\text{m}^3$  (SD=3.04), and the mean of PM2.5 was 8.70  $\mu\text{g}/\text{m}^3$  (SD=2.14)  
 295 (Table2).

296 Table 2: Exposure description and correlation matrix of air pollutants (N=42,619 LSOAs;  
 297 time=2015-2019)

|                                              | Pearson’s correlation coefficient               |                                                 |                                      |                                       | Mean  | SD   | Median | Interquartile range |
|----------------------------------------------|-------------------------------------------------|-------------------------------------------------|--------------------------------------|---------------------------------------|-------|------|--------|---------------------|
|                                              | NO <sub>2</sub><br>( $\mu\text{g}/\text{m}^3$ ) | SO <sub>2</sub><br>( $\mu\text{g}/\text{m}^3$ ) | PM10<br>( $\mu\text{g}/\text{m}^3$ ) | PM2.5<br>( $\mu\text{g}/\text{m}^3$ ) |       |      |        |                     |
| NO <sub>2</sub> ( $\mu\text{g}/\text{m}^3$ ) | 1.00                                            |                                                 |                                      |                                       | 14.05 | 6.64 | 13.29  | 8.35                |
| SO <sub>2</sub> ( $\mu\text{g}/\text{m}^3$ ) | 0.55                                            | 1.00                                            |                                      |                                       | 1.44  | 0.60 | 1.34   | 0.75                |
| PM10 ( $\mu\text{g}/\text{m}^3$ )            | <b>0.72</b>                                     | 0.43                                            | 1.00                                 |                                       | 13.37 | 3.04 | 13.56  | 4.58                |
| PM2.5 ( $\mu\text{g}/\text{m}^3$ )           | <b>0.74</b>                                     | 0.47                                            | <b>0.98</b>                          | 1.00                                  | 8.70  | 2.14 | 8.89   | 3.29                |

298 Strong correlations with correlation coefficient  $\geq 0.70$  are highlighted in bold.

299

300 **3.3. The spatial-temporal effect of air pollution on GP visits and hospital**  
 301 **admissions**

302 Results showed that higher visits to a GP are associated with higher concentrations of NO<sub>2</sub>  
 303 (OR=1.011, 95%CI=1.007-1.015) and SO<sub>2</sub> (OR=1.123, 95%CI=1.087-1.160) pollutants.  
 304 Higher odds of outpatient hospital admissions were observed with increased concentrations of  
 305 NO<sub>2</sub> (OR=1.009, 95%CI=1.006-1.013), SO<sub>2</sub> (OR=1.063, 95%CI=1.030-1.097), PM10  
 306 (OR=1.013, 95%CI=1.006-1.021) and PM2.5 (OR=1.022, 95%CI=1.012-1.032) pollutants  
 307 (Table 3).

308 Decomposing the overall effect of air pollution on GP visits and hospital admissions into  
 309 *between* (spatial: across LSOAs) and *within* (temporal: across years within each LSOA) effects,  
 310 showed significant positive associations for the *between* effect on GP visits for NO<sub>2</sub>

311 (OR=1.011, 95%CI=1.007-1.015) and SO<sub>2</sub> (OR=1.123, 95%CI=1.077, 1.170) pollutants, and  
 312 a significant *between* effect on outpatient hospital admissions for all the four pollutants. No  
 313 significant *within* effects were noted for all the four pollutants neither on GP visits nor on  
 314 hospital admissions (Table 3).

315 Table 3: The association of air pollution with GP visits and outpatient hospital admissions  
 316 (N=140,466 surveys from 46,442 individuals)

|                                      | GP visits              | Outpatient hospital admissions |
|--------------------------------------|------------------------|--------------------------------|
|                                      | OR [95%CI]             | OR [95%CI]                     |
| <b>Overall pollution effect</b>      |                        |                                |
| NO <sub>2</sub> (µg/m <sup>3</sup> ) | 1.011 [1.007, 1.015]** | 1.009 [1.006, 1.013]**         |
| SO <sub>2</sub> (µg/m <sup>3</sup> ) | 1.123 [1.087, 1.160]** | 1.063 [1.030, 1.097]**         |
| PM10 (µg/m <sup>3</sup> )            | 1.003 [0.995, 1.010]   | 1.013 [1.006, 1.021]**         |
| PM2.5 (µg/m <sup>3</sup> )           | 1.004 [0.994, 1.015]   | 1.022 [1.012, 1.032]**         |
| <b>Between pollution effect</b>      |                        |                                |
| NO <sub>2</sub> (µg/m <sup>3</sup> ) | 1.011 [1.007, 1.015]** | 1.010 [1.007, 1.014]**         |
| SO <sub>2</sub> (µg/m <sup>3</sup> ) | 1.123 [1.077, 1.170]** | 1.053 [1.013, 1.095]*          |
| PM10 (µg/m <sup>3</sup> )            | 1.005 [0.997, 1.013]   | 1.014 [1.006, 1.022]**         |
| PM2.5 (µg/m <sup>3</sup> )           | 1.009 [0.997, 1.022]   | 1.024 [1.012, 1.035]**         |
| <b>Within pollution effect</b>       |                        |                                |
| NO <sub>2</sub> (µg/m <sup>3</sup> ) | 0.999 [0.977, 1.022]   | 0.994 [0.970, 1.018]           |
| SO <sub>2</sub> (µg/m <sup>3</sup> ) | 1.068 [0.972, 1.173]   | 1.011 [0.915, 1.118]           |
| PM10 (µg/m <sup>3</sup> )            | 1.009 [0.982, 1.036]   | 1.009 [0.980, 1.038]           |
| PM2.5 (µg/m <sup>3</sup> )           | 1.000 [0.963, 1.039]   | 0.997 [0.958, 1.039]           |

317 \*\*P-value <0.01; \*P-value<0.05

318 ORs and 95%CIs are expressed in terms of 1 µg/m<sup>3</sup> increase in the air pollutants; Models are adjusted  
 319 for age, gender, ethnicity, country of birth, marital status, education, perceived financial situation,  
 320 socioeconomic classification, smoking status, and year dummies (2015-2019).

321

322

### 323 3.4. The association of air pollution with GP visits and hospital admissions by 324 ethnicity and country of birth

325 Examining the association between ethnicity and GP visits revealed higher odds of GP visits  
 326 among Indian (OR=1.301, 95%CI=1.159-1.462), Pakistani/Bangladeshi (OR=1.525,  
 327 95%CI=1.372-1.694), and mixed ethnicities (OR=1.249, 95%CI=1.079-1.447) in comparison  
 328 to British-white and among non-UK-born individuals (OR=1.239, 95%CI=1.148-1.337)  
 329 compared to UK-born (Appendix: Table A1). In contrast, higher odds of outpatient hospital

330 admissions were observed only among mixed ethnicities (OR=1.385, 95%CI=1.199-1.600),  
331 while Pakistani/Bangladeshi (OR=0.886, 95%CI=0.800-0.981) and non-UK-born individuals  
332 (OR=0.893, 95%CI=0.828-0.963) exhibited lower odds of hospital admissions (Appendix:  
333 Table A2).

334 Our analysis showed no differences between ethnic minorities and British-white for the effect  
335 of air pollution on GP visits and outpatient hospital admissions (Fig 2 and Fig 3). Thus, ethnic  
336 minorities do not seem to experience greater health-related effects from exposure to air  
337 pollution compared to the rest of population. The only exception were non-UK-born  
338 individuals who were more likely to visit a GP than UK-born individuals with increasing  
339 concentrations of all the four pollutants (Fig 2).

340 Analysing the *between-within* (spatial-temporal) effects of air pollution on GP visits and  
341 hospital admissions by ethnicity and country of birth did not show significant associations  
342 neither for the *between* nor for the *within* effects (Fig 4 and Fig 5); except for non-UK-born  
343 individuals who showed higher odds of GP visits with increasing concentrations of all the four  
344 pollutants for the *between* (spatial) effects in comparison to UK-born individuals (Fig 4).

345

346

347 Fig 2: The overall effect of air pollution on GP visits by ethnicity and country of birth  
348 (N=140,466 surveys from 46,442 individuals)

349 ORs and 95%CIs are expressed in terms of 1  $\mu\text{g}/\text{m}^3$  increase in the air pollutants; The dashed line is placed at  
350 OR=1 as a cut-off for statistically insignificant results; The solid line separates between the air pollution-ethnicity  
351 interaction models and the air pollution-country of birth interaction models; Air pollution-ethnicity interaction  
352 models where the reference category is “British-white” are adjusted for country of birth, age, gender, marital  
353 status, education, perceived financial situation, socioeconomic classification, smoking status, and year dummies  
354 (2015-2019); Air pollution-country of birth interaction models where the reference category is “born in UK” are  
355 adjusted for ethnicity, age, gender, marital status, education, perceived financial situation, socioeconomic  
356 classification, smoking status, and year dummies (2015-2019).

357



358 Fig 3: The overall effect of air pollution on outpatient hospital admissions by ethnicity and  
359 country of birth (N=140,466 surveys from 46,442 individuals)

360 ORs and 95%CIs are expressed in terms of 1  $\mu\text{g}/\text{m}^3$  increase in the air pollutants; The dashed line is placed at  
361 OR=1 as a cut-off for statistically insignificant results; The solid line separates between the air pollution-ethnicity  
362 interaction models and the air pollution-country of birth interaction models; Air pollution-ethnicity interaction  
363 models where the reference category is “British-white” are adjusted for country of birth, age, gender, marital  
364 status, education, perceived financial situation, socioeconomic classification, smoking status, and year dummies  
365 (2015-2019); Air pollution-country of birth interaction models where the reference category is “born in UK” are  
366 adjusted for ethnicity, age, gender, marital status, education, perceived financial situation, socioeconomic  
367 classification, smoking status, and year dummies (2015-2019).

368

369 Fig 4: The *between-within* (spatial-temporal) effect of air pollution on GP visits by ethnicity  
370 and country of birth (N=140,466 surveys from 46,442 individuals)

371 ORs and 95%CIs are expressed in terms of 1  $\mu\text{g}/\text{m}^3$  increase in the air pollutants; The dashed line is placed at  
372 OR=1 as a cut-off for statistically insignificant results; The solid line separates between the air pollution-ethnicity  
373 interaction models and the air pollution-country of birth interaction models; Air pollution-ethnicity interaction  
374 models where the reference category is “British-white” are adjusted for country of birth, age, gender, marital  
375 status, education, perceived financial situation, socioeconomic classification, smoking status, and year dummies  
376 (2015-2019); Air pollution-country of birth interaction models where the reference category is “born in UK” are  
377 adjusted for ethnicity, age, gender, marital status, education, perceived financial situation, socioeconomic  
378 classification, smoking status, and year dummies (2015-2019).

379

380 Fig 5: The *between-within* (spatial-temporal) effect of air pollution on outpatient hospital  
381 admissions by ethnicity and country of birth (N=140,466 surveys from 46,442 individuals)

382 ORs and 95%CIs are expressed in terms of 1  $\mu\text{g}/\text{m}^3$  increase in the air pollutants; The dashed line is placed at  
383 OR=1 as a cut-off for statistically insignificant results; The solid line separates between the air pollution-ethnicity  
384 interaction models and the air pollution-country of birth interaction models; Air pollution-ethnicity interaction  
385 models where the reference category is “British-white” are adjusted for country of birth, age, gender, marital  
386 status, education, perceived financial situation, socioeconomic classification, smoking status, and year dummies  
387 (2015-2019); Air pollution-country of birth interaction models where the reference category is “born in UK” are  
388 adjusted for ethnicity, age, gender, marital status, education, perceived financial situation, socioeconomic  
389 classification, smoking status, and year dummies (2015-2019).

390

#### 391 4. Discussion

392 In this study, we showed that exposure to four air pollutants ( $\text{NO}_2$ ,  $\text{SO}_2$ ,  $\text{PM}_{10}$ , and  $\text{PM}_{2.5}$ )  
393 results in higher frequency of GP visits and outpatient hospital admissions in the UK, which is  
394 supported by relevant literature (1, 2, 6, 8, 43, 44). For instance, a 1% increase in the risk of  
395 cardiac hospital admissions in Italy was observed per 10  $\mu\text{g}/\text{m}^3$  increase in  $\text{PM}_{10}$  pollutant  
396 (45). In Istanbul-Turkey, short-term exposure to  $\text{NO}_2$ ,  $\text{PM}_{10}$ , and  $\text{PM}_{2.5}$  air pollution was  
397 positively associated with increased respiratory hospital admissions between 2013 and 2015



398 (46). In Australia, a 1% increase in PM10 was associated with 0.6% increase in the number of  
399 hospital admissions and 0.5% increase in the number of GP visits (47).

400 One main novelty of this study is the application of a *between-within* analysis that reveals the  
401 *spatial-temporal* effects of air pollution on GP visits and outpatient hospital admissions.

402 Although the *between-within* analysis is widely used in the fields of economics, behavioural  
403 finance, and strategic management (32), it is rarely applied in health research (48); and no

404 previous study has assessed the *between-within* effects of air pollution on GP visits and hospital  
405 admissions. Applying the *between-within* analysis in this study allowed us to observe

406 significant *between* effects for air pollution on GP visits and hospital admissions; yet, no  
407 significant *within* effects were noticed. Therefore, individuals residing in LSOAs with higher

408 exposure to air pollution across the five years of follow-up exhibited higher frequency of GP  
409 visits and outpatient hospital admissions than individuals residing in LSOAs with lower

410 pollution exposure. Thus, our study shows strong evidence for the spatial rather than temporal  
411 effects of air pollution on GP visits and outpatient hospital admissions in the UK. This could

412 be explained by the emission source of air pollutants and their chemical and physical properties.

413 The major source of NO<sub>2</sub> emissions is traffic exhaust (49) which varies across both LSOAs  
414 (*between: spatial*) and time (*within: temporal*) depending on the number of vehicles and the

415 movement of people. Yet, nitrogen oxides are highly reactive and seasonal pollutants (50),  
416 which makes it difficult to capture their temporal variation through yearly measurements. For

417 instance, more NO<sub>2</sub> will be liberated into the atmosphere during warm seasons due to the  
418 chemical reactions between nitrogen oxides and ozone (50). Additionally, NO<sub>2</sub> is converted

419 into nitric acid by several different reactions in the atmosphere (51). That's why only spatial  
420 (*between*) but not temporal (*within*) effects for NO<sub>2</sub> pollutant were observed when taking the

421 year as our time measuring unit. On the other hand, industrial processes and power plants are  
422 the major sources of SO<sub>2</sub> pollution (52), which is dominated by spatial (*between*) variation

423 rather than temporal (*within*) variation as building a new factory requires much longer time  
424 than purchasing a motor vehicle. Particulate matter results from both traffic exhaust and  
425 industrial processes (53), and is considered a more stable pollutant that may stay suspended in  
426 the air for long periods of time (51). Given the localized industrial source of particulate matter  
427 pollution and its stability in the atmosphere which limits its variation across time, a spatial  
428 (*between*) effect on health-related outcomes is expected rather than a temporal (*within*) effect.  
429 It should be noted, however, that the insignificant *within* effects for all the pollutants could also  
430 be attributed to the relatively short period of follow-up (2015-2019) which does not allow for  
431 a high variation in the yearly air pollution concentrations. Thus, for future research, it is  
432 recommended to use datasets that allow for a longer follow-up time that might result in  
433 significant *within* effects.

434 Apart from the spatial-temporal (*between-within*) analysis, our study contributed to the topic  
435 of ethnic inequalities in health by investigating the differences in the effect of air pollution on  
436 GP visits and outpatient hospital admissions by ethnicity and country of birth. Our results  
437 showed no differences between ethnic minorities and British-white for the association between  
438 air pollution and hospital admissions and GP visits. Nevertheless, non-UK-born individuals  
439 were more likely to visit a GP than UK-born individuals with increasing concentrations of all  
440 the four pollutants. The more pronounced effect of air pollution on GP visits among non-UK-  
441 born individuals compared to UK-born was a spatial one rather than a temporal one as shown  
442 in the *between-within* analysis. This shows the importance of contextual location-specific  
443 factors in explaining the differences in air pollution exposure and their consequent effect on  
444 health-related outcomes for non-UK-born individuals versus UK-born. Research has shown  
445 that immigrants (i.e. non-UK-born) often live in large cities and highly populated urbanised  
446 regions, near major roads and key transportation networks. This facilitates their movement and  
447 increases their chances of personal development, employment, and business start-ups (54).

448 Furthermore, immigrants often live in low-priced housing, which is often situated in more  
449 deprived immigrants' concentration neighbourhoods or close to major roads (25). These  
450 contextual-spatial factors can result in more pronounced mild health consequences and higher  
451 frequency of GP visits among immigrants due to the greater exposure to traffic exhaustion and  
452 industrial pollution in comparison to UK-born individuals who have additional financial  
453 resources and inheritance tenure to move away from metropolitan areas and highly polluted  
454 industrial regions. Additionally, immigrants (especially those coming from outside Europe)  
455 might have been exposed to higher air pollution concentrations in their countries of origin prior  
456 to arriving into the UK, which might result in higher frequency of GP visits due to the  
457 cumulative effect of air pollution on health among non-UK-born individuals compared to UK-  
458 born.

459 In addition to highlighting the contributions of the present study, it is equally important to  
460 discuss its limitations. First, the study design involved linking individual-level data from the  
461 UKHLS dataset to yearly air pollution data at the LSOAs level, under the assumption that  
462 individuals residing in the same LSOA are exposed to the same concentration of air pollution.  
463 Although LSOAs have high spatial resolution, using another dataset that allows for air  
464 pollution linkages at the level of postcodes which possess the highest spatial resolution in the  
465 UK is recommended as it would greatly minimize the exposure bias. Another source of  
466 exposure bias in this study might come from the assessment of individuals' exposure to air  
467 pollution using the place (LSOA) of residence which does not necessarily equate to the true  
468 personal exposure. In reality, an exposure scenario is more complex involving exposure  
469 indoors, at the workplace and through commuting patterns. Therefore, future studies are  
470 encouraged to integrate air pollution exposure at the residence and workplace and to consider  
471 both ambient and indoors air pollution exposure. Finally, our study included individuals  
472 followed over five years (2015-2019) and we assessed the association between air pollution

473 and GP visits and hospital admissions at a yearly rather than monthly or daily basis. This could  
474 explain the inability of observing significant temporal (*within*) effects of air pollution on GP  
475 visits and outpatient hospital admissions due to the low variation in air pollution across the five  
476 years of follow-up. Thus, for future research, we recommend using other datasets that allow  
477 for longer follow-up time and for monthly or daily air pollution exposure which would increase  
478 the temporal and seasonal variation and result in significant temporal effects.

## 479 **5. Conclusion**

480 Using longitudinal individual-level data linked to air pollution data at the LSOAs level, this  
481 study supports the presence of a spatial-temporal association between air pollution and higher  
482 frequency of GP visits and outpatient hospital admissions in the UK. Results showed stronger  
483 *between* (spatial) effects across LSOAs rather than *within* (temporal) effects across time within  
484 each LSOA. However, ethnic minorities do not seem to experience greater health-related  
485 effects from exposure to air pollution compared to the rest of population. An exception was for  
486 non-UK-born individuals who showed higher odds of GP visits with increasing concentrations  
487 of air pollution compared to those born in the UK, which is mainly attributed to contextual  
488 location-specific differences. Our results are of importance for policymakers toward improving  
489 the environmental conditions that would reduce air pollution and eventually lower the  
490 frequency of GP visits and outpatient hospital admissions for people residing in the UK.

## 491 **Acknowledgements**

492 **Conflict of Interest:** The authors declare that they have no conflict of interest.

493 **Funding Statement:** The work presented in this paper was funded by the Royal Society of  
494 Edinburgh (RSE) Saltire Early Career Fellowships grant (RSE Grant Reference Number:  
495 1846).

496 **Author contribution statement:**

497 Mary Abed Al Ahad: Conceptualization, Investigation, Methodology, Data curation, Formal  
498 Analysis, Writing-Original Draft, Writing-Review and Editing, Visualization, Project  
499 administration, Funding acquisition.

500

501

502

503

504

505

506

507

508

509

510

511

512

## 513 **References**

- 514 1. Ab Manan N, Noor Aizuddin A, Hod R. Effect of Air Pollution and Hospital Admission: A  
515 Systematic Review. *Ann Glob Health*. 2018;84(4):670-8.
- 516 2. Abed Al Ahad M, Sullivan F, Demšar U, Melhem M, Kulu H. The effect of air-pollution and  
517 weather exposure on mortality and hospital admission and implications for further research: A  
518 systematic scoping review. *PLoS One*. 2020;15(10):e0241415.
- 519 3. Manisalidis I, Stavropoulou E, Stavropoulos A, Bezirtzoglou E. Environmental and Health  
520 Impacts of Air Pollution: A Review. *Front Public Health*. 2020;8:14-.

- 521 4. Tsangari H, Paschalidou AK, Kassomenos AP, Vardoulakis S, Heaviside C, Georgiou KE, et al.  
522 Extreme weather and air pollution effects on cardiovascular and respiratory hospital admissions in  
523 Cyprus. *Science of The Total Environment*. 2016;542:247-53.
- 524 5. Dominski FH, Lorenzetti Branco JH, Buonanno G, Stabile L, Gameiro da Silva M, Andrade A.  
525 Effects of air pollution on health: A mapping review of systematic reviews and meta-analyses.  
526 *Environmental Research*. 2021;201:111487.
- 527 6. Cruz AMJ, Sarmiento S, Almeida SM, Silva AV, Alves C, Freitas MC, et al. Association between  
528 atmospheric pollutants and hospital admissions in Lisbon. *Environmental Science and Pollution*  
529 *Research*. 2015;22(7):5500-10.
- 530 7. Kloog I, Coull BA, Zanobetti A, Koutrakis P, Schwartz JD. Acute and Chronic Effects of  
531 Particles on Hospital Admissions in New-England. *PLoS One*. 2012;7(4):e34664.
- 532 8. Mehta AJ, Schindler C, Pérez L, Probst-Hensch N, Schwartz J, Brändl O, et al. Acute  
533 respiratory health effects of urban air pollutants in adults with different patterns of underlying  
534 respiratory disease. *Swiss medical weekly*. 2012;142:w13681.
- 535 9. Riedel N, Loerbroks A, Bolte G, Li J. Do perceived job insecurity and annoyance due to air and  
536 noise pollution predict incident self-rated poor health? A prospective analysis of independent and  
537 joint associations using a German national representative cohort study. *BMJ Open*.  
538 2017;7(1):e012815.
- 539 10. Kuźma Ł, Struniawski K, Pogorzelski S, Bachórzewska-Gajewska H, Dobrzycki S. Gender  
540 Differences in Association between Air Pollution and Daily Mortality in the Capital of the Green  
541 Lungs of Poland-Population-Based Study with 2,953,000 Person-Years of Follow-Up. *J Clin Med*.  
542 2020;9(8):2351.
- 543 11. Strak M, Weinmayr G, Rodopoulou S, Chen J, de Hoogh K, Andersen ZJ, et al. Long term  
544 exposure to low level air pollution and mortality in eight European cohorts within the ELAPSE  
545 project: pooled analysis. *BMJ*. 2021;374:n1904.
- 546 12. Milojevic A, Niedzwiedz CL, Pearce J, Milner J, MacKenzie IA, Doherty RM, et al.  
547 Socioeconomic and urban-rural differentials in exposure to air pollution and mortality burden in  
548 England. *Environmental Health*. 2017;16(1):104.
- 549 13. Faustini A, Stafoggia M, Renzi M, Cesaroni G, Alessandrini E, Davoli M, et al. Does chronic  
550 exposure to high levels of nitrogen dioxide exacerbate the short-term effects of airborne particles?  
551 *Occupational and Environmental Medicine*. 2016;73(11):772.
- 552 14. Andersen Zorana J, de Nazelle A, Mendez Michelle A, Garcia-Aymerich J, Hertel O,  
553 Tjønneland A, et al. A Study of the Combined Effects of Physical Activity and Air Pollution on  
554 Mortality in Elderly Urban Residents: The Danish Diet, Cancer, and Health Cohort. *Environmental*  
555 *Health Perspectives*. 2015;123(6):557-63.
- 556 15. Weichenthal S, Hoppin JA, Reeves F. Obesity and the cardiovascular health effects of fine  
557 particulate air pollution. *Obesity*. 2014;22(7):1580-9.
- 558 16. Beelen R, Hoek G, van den Brandt Piet A, Goldbohm RA, Fischer P, Schouten Leo J, et al.  
559 Long-Term Effects of Traffic-Related Air Pollution on Mortality in a Dutch Cohort (NLCS-AIR Study).  
560 *Environmental Health Perspectives*. 2008;116(2):196-202.
- 561 17. Cesaroni G, Badaloni C, Gariazzo C, Stafoggia M, Sozzi R, Davoli M, et al. Long-Term Exposure  
562 to Urban Air Pollution and Mortality in a Cohort of More than a Million Adults in Rome.  
563 *Environmental Health Perspectives*. 2013;121(3):324-31.
- 564 18. Tonne C, Halonen JI, Beevers SD, Dajnak D, Gulliver J, Kelly FJ, et al. Long-term traffic air and  
565 noise pollution in relation to mortality and hospital readmission among myocardial infarction  
566 survivors. *Int J Hyg Environ Health*. 2016;219(1):72-8.
- 567 19. Nawrot TS, Torfs R, Fierens F, De Henauw S, Hoet PH, Van Kersschaever G, et al. Stronger  
568 associations between daily mortality and fine particulate air pollution in summer than in winter:  
569 evidence from a heavily polluted region in western Europe. *Journal of Epidemiology and Community*  
570 *Health*. 2007;61(2):146.

- 571 20. Stafoggia M, Schwartz J, Forastiere F, Perucci CA, the SG. Does Temperature Modify the  
572 Association between Air Pollution and Mortality? A Multicity Case-Crossover Analysis in Italy.  
573 *American Journal of Epidemiology*. 2008;167(12):1476-85.
- 574 21. Analitis A, De' Donato F, Scortichini M, Lanki T, Basagana X, Ballester F, et al. Synergistic  
575 Effects of Ambient Temperature and Air Pollution on Health in Europe: Results from the PHASE  
576 Project. *Int J Environ Res Public Health*. 2018;15(9).
- 577 22. Walker RJ, Strom Williams J, Egede LE. Influence of Race, Ethnicity and Social Determinants  
578 of Health on Diabetes Outcomes. *Am J Med Sci*. 2016;351(4):366-73.
- 579 23. Smith NR, Lewis DJ, Fahy A, Eldridge S, Taylor SJC, Moore DG, et al. Individual socio-  
580 demographic factors and perceptions of the environment as determinants of inequalities in  
581 adolescent physical and psychological health: the Olympic Regeneration in East London (ORIEL)  
582 study. *BMC Public Health*. 2015;15(1):150.
- 583 24. Glad JA, Brink LL, Talbott EO, Lee PC, Xu X, Saul M, et al. The Relationship of Ambient Ozone  
584 and PM2.5 Levels and Asthma Emergency Department Visits: Possible Influence of Gender and  
585 Ethnicity. *Archives of Environmental & Occupational Health*. 2012;67(2):103-8.
- 586 25. van Ham M, Manley D. Social housing allocation, choice and neighbourhood ethnic mix in  
587 England. *Journal of Housing and the Built Environment*. 2009;24(4):407-22.
- 588 26. Cézard G, Finney N, Kulu H, Marshall A. Ethnic differences in self-assessed health in Scotland:  
589 The role of socio-economic status and migrant generation. *Population, Space and Place*.  
590 2020;n/a(n/a):e2403.
- 591 27. Wallace M, Kulu H. Migration and Health in England and Scotland: a Study of Migrant  
592 Selectivity and Salmon Bias. *Population, Space and Place*. 2014;20(8):694-708.
- 593 28. Johnson D, Parker JD. Air pollution exposure and self-reported cardiovascular disease.  
594 *Environmental Research*. 2009;109(5):582-9.
- 595 29. Nachman KE, Parker JD. Exposures to fine particulate air pollution and respiratory outcomes  
596 in adults using two national datasets: a cross-sectional study. *Environ Health*. 2012;11:25.
- 597 30. Parker JD, Kravets N, Vaidyanathan A. Particulate Matter Air Pollution Exposure and Heart  
598 Disease Mortality Risks by Race and Ethnicity in the United States. *Circulation*. 2018;137(16):1688-  
599 97.
- 600 31. Schmidt-Catran AW, Fairbrother M. The Random Effects in Multilevel Models: Getting Them  
601 Wrong and Getting Them Right. *European Sociological Review*. 2016;32(1):23-38.
- 602 32. McNeish D, Kelley K. Fixed effects models versus mixed effects models for clustered data:  
603 Reviewing the approaches, disentangling the differences, and making recommendations. *Psychol*  
604 *Methods*. 2019;24(1):20-35.
- 605 33. University of Essex. Understanding Society: Waves 1-10, 2009-2019 and Harmonised BHPS:  
606 Waves 1-18, 1991-2009. In: University of Essex IfSaER, NatCen Social Research, Kantar Public, editor.  
607 13th Edition ed. UK Data Service 2020.
- 608 34. Lynn P. Sample design for understanding society. *Underst Soc Work Pap Ser*. 2009;2009.
- 609 35. Lynn P, Nandi A, Parutis V, Platt L. Design and implementation of a high-quality probability  
610 sample of immigrants and ethnic minorities: Lessons learnt. *Demographic Research*. 2018;38:513-48.
- 611 36. Abed Al Ahad M, Demšar U, Sullivan F, Kulu H. Air pollution and individuals' mental well-  
612 being in the adult population in United Kingdom: A spatial-temporal longitudinal study and the  
613 moderating effect of ethnicity. *PLoS One*. 2022;17(3):e0264394.
- 614 37. Modelled background pollution data [Internet]. 2020. Available from: [https://uk-](https://uk-air.defra.gov.uk/data/pcm-data)  
615 [air.defra.gov.uk/data/pcm-data](https://uk-air.defra.gov.uk/data/pcm-data).
- 616 38. Dimakopoulou K, Samoli E, Beelen R, Stafoggia M, Andersen ZJ, Hoffmann B, et al. Air  
617 pollution and nonmalignant respiratory mortality in 16 cohorts within the ESCAPE project. *American*  
618 *journal of respiratory and critical care medicine*. 2014;189(6):684-96.
- 619 39. Beelen R, Stafoggia M, Raaschou-Nielsen O, Andersen ZJ, Xun WW, Katsouyanni K, et al.  
620 Long-term exposure to air pollution and cardiovascular mortality: an analysis of 22 European  
621 cohorts. *Epidemiology*. 2014;25(3):368-78.



- 622 40. Carugno M, Consonni D, Randi G, Catelan D, Grisotto L, Bertazzi PA, et al. Air pollution  
623 exposure, cause-specific deaths and hospitalizations in a highly polluted Italian region.  
624 *Environmental Research*. 2016;147:415-24.
- 625 41. Hůnová I, Malý M, Řezáčová J, Braniš M. Association between ambient ozone and health  
626 outcomes in Prague. *International Archives of Occupational and Environmental Health*.  
627 2013;86(1):89-97.
- 628 42. Schober P, Boer C, Schwarte LA. Correlation Coefficients: Appropriate Use and  
629 Interpretation. *Anesth Analg*. 2018;126(5):1763-8.
- 630 43. Lanzinger S, Schneider A, Breitner S, Stafoggia M, Erzen I, Dostal M, et al. Ultrafine and Fine  
631 Particles and Hospital Admissions in Central Europe. Results from the UFIREG Study. *American*  
632 *Journal of Respiratory and Critical Care Medicine*. 2016;194(10):1233-41.
- 633 44. Almeida SM, Silva AV, Sarmento S. Effects of exposure to particles and ozone on hospital  
634 admissions for cardiorespiratory diseases in Setúbal, Portugal. *J Toxicol Environ Health A*.  
635 2014;77(14-16):837-48.
- 636 45. Colais P, Faustini A, Stafoggia M, Berti G, Bisanti L, Cadum E, et al. Particulate Air Pollution  
637 and Hospital Admissions for Cardiac Diseases in Potentially Sensitive Subgroups. *Epidemiology*.  
638 2012;23(3).
- 639 46. Çapraz Ö, Deniz A, Doğan N. Effects of air pollution on respiratory hospital admissions in  
640 İstanbul, Turkey, 2013 to 2015. *Chemosphere*. 2017;181:544-50.
- 641 47. Afoakwah C, Nghiem S, Scuffham P, Huynh Q, Marwick T, Byrnes J. Impacts of air pollution  
642 on health: evidence from longitudinal cohort data of patients with cardiovascular diseases. *The*  
643 *European Journal of Health Economics*. 2020;21(7):1025-38.
- 644 48. Dieleman JL, Templin T. Random-Effects, Fixed-Effects and the within-between Specification  
645 for Clustered Data in Observational Health Studies: A Simulation Study. *PLoS One*.  
646 2014;9(10):e110257.
- 647 49. Grazuleviciene R, Maroziene L, Dulskiene V, Malinauskiene V, Azaraviciene A, Laurinaviciene  
648 D, et al. Exposure to urban nitrogen dioxide pollution and the risk of myocardial infarction.  
649 *Scandinavian Journal of Work, Environment & Health*. 2004;30(4):293-8.
- 650 50. Masiol M, Agostinelli C, Formenton G, Tarabotti E, Pavoni B. Thirteen years of air pollution  
651 hourly monitoring in a large city: Potential sources, trends, cycles and effects of car-free days.  
652 *Science of The Total Environment*. 2014;494-495:84-96.
- 653 51. Malek E, Davis T, Martin RS, Silva PJ. Meteorological and environmental aspects of one of  
654 the worst national air pollution episodes (January, 2004) in Logan, Cache Valley, Utah, USA.  
655 *Atmospheric Research*. 2006;79(2):108-22.
- 656 52. Vestreng V, Myhre G, Fagerli H, Reis S, Tarrasón L. Twenty-five years of continuous sulphur  
657 dioxide emission reduction in Europe. *Atmos Chem Phys*. 2007;7(13):3663-81.
- 658 53. Jyethi DS. Air Quality: Global and Regional Emissions of Particulate Matter, SO<sub>x</sub>, and NO<sub>x</sub>. In:  
659 Kulshrestha U, Saxena P, editors. *Plant Responses to Air Pollution*. Singapore: Springer Singapore;  
660 2016. p. 5-19.
- 661 54. Lucas K, Stokes G, Bastiaanssen J, Burkinshaw J. Inequalities in Mobility and Access in the UK  
662 Transport System. *Future of Mobility: Evidence Review*, Government Office for Science. 2019.

663

664

665

666

667

668



669  
670  
671  
672  
673  
674  
675  
676  
677  
678  
679  
680  
681  
682  
683  
684  
685  
686  
687  
688  
689  
690  
691  
692

693 **Appendix**

694 Table A1: The association of GP visits with the socioeconomic and lifestyle covariates  
695 (N=140,466 surveys from 46,442 individuals)

|                  |                         | <b>OR</b> | <b>P-value</b> | <b>lower 95%CI</b> | <b>Upper 95% CI</b> |
|------------------|-------------------------|-----------|----------------|--------------------|---------------------|
| <b>Ethnicity</b> | British-white           | Ref       |                |                    |                     |
|                  | Other-white             | 0.840     | 0.001          | 0.762              | 0.927               |
|                  | Indian                  | 1.301     | 0.000          | 1.159              | 1.462               |
|                  | Pakistani/Bangladeshi   | 1.525     | 0.000          | 1.372              | 1.694               |
|                  | Black/African/Caribbean | 1.104     | 0.079          | 0.989              | 1.233               |
|                  | Mixed ethnicities       | 1.249     | 0.003          | 1.079              | 1.447               |

|                                       |                                         |       |       |       |       |
|---------------------------------------|-----------------------------------------|-------|-------|-------|-------|
|                                       | Other ethnicities                       | 0.884 | 0.046 | 0.782 | 0.998 |
| <b>Country of birth</b>               | Born in the UK                          | Ref   |       |       |       |
|                                       | Not born in the UK                      | 1.239 | 0.000 | 1.148 | 1.337 |
|                                       | No answer                               | 0.775 | 0.000 | 0.725 | 0.829 |
| <b>Age</b>                            | 16-18                                   | Ref   |       |       |       |
|                                       | 19-23                                   | 1.112 | 0.027 | 1.012 | 1.222 |
|                                       | 24-28                                   | 1.277 | 0.000 | 1.138 | 1.433 |
|                                       | 29-33                                   | 1.316 | 0.000 | 1.165 | 1.486 |
|                                       | 34-38                                   | 1.202 | 0.003 | 1.064 | 1.358 |
|                                       | 39-43                                   | 1.259 | 0.000 | 1.115 | 1.423 |
|                                       | 44-48                                   | 1.446 | 0.000 | 1.281 | 1.631 |
|                                       | 49-53                                   | 1.615 | 0.000 | 1.431 | 1.824 |
|                                       | 54-58                                   | 1.909 | 0.000 | 1.689 | 2.157 |
|                                       | 59-63                                   | 1.963 | 0.000 | 1.733 | 2.225 |
|                                       | 64-68                                   | 2.084 | 0.000 | 1.834 | 2.367 |
|                                       | 69-73                                   | 2.306 | 0.000 | 2.023 | 2.628 |
|                                       | 74-78                                   | 2.823 | 0.000 | 2.458 | 3.242 |
|                                       | >78                                     | 3.547 | 0.000 | 3.071 | 4.096 |
| <b>Gender</b>                         | Male                                    | Ref   |       |       |       |
|                                       | Female                                  | 2.235 | 0.000 | 2.147 | 2.327 |
| <b>Education</b>                      | University degree                       | Ref   |       |       |       |
|                                       | High school degree                      | 1.054 | 0.056 | 0.999 | 1.112 |
|                                       | Lower educational levels                | 1.496 | 0.000 | 1.230 | 1.819 |
|                                       | Other qualifications                    | 1.452 | 0.000 | 1.366 | 1.543 |
|                                       | Still a student                         | 0.799 | 0.000 | 0.730 | 0.876 |
| <b>Marital status</b>                 | Married                                 | Ref   |       |       |       |
|                                       | Living as a couple                      | 1.141 | 0.000 | 1.071 | 1.217 |
|                                       | Widowed                                 | 0.916 | 0.050 | 0.839 | 1.000 |
|                                       | Divorced/separated                      | 1.220 | 0.000 | 1.137 | 1.309 |
|                                       | Single never married                    | 0.990 | 0.745 | 0.931 | 1.052 |
|                                       | No answer                               | 0.913 | 0.461 | 0.716 | 1.164 |
| <b>Subjective financial situation</b> | Living comfortably/doing alright        | Ref   |       |       |       |
|                                       | Living difficultly                      | 1.501 | 0.000 | 1.451 | 1.552 |
|                                       | No answer                               | 0.819 | 0.093 | 0.648 | 1.034 |
| <b>Socio-economic classification</b>  | Management and professional occupations | Ref   |       |       |       |
|                                       | Intermediate occupations                | 0.992 | 0.791 | 0.935 | 1.053 |
|                                       | Routine occupations                     | 1.117 | 0.000 | 1.056 | 1.182 |
|                                       | NA: student/retired/not working         | 1.845 | 0.000 | 1.749 | 1.946 |
|                                       | No answer                               | 1.013 | 0.830 | 0.904 | 1.135 |
| <b>Smoking status</b>                 | Non smoker                              | Ref   |       |       |       |
|                                       | Smoker                                  | 1.128 | 0.000 | 1.072 | 1.187 |
|                                       | No answer                               | 0.961 | 0.815 | 0.686 | 1.345 |
| <b>Time dummies</b>                   | 2015                                    | Ref   |       |       |       |
|                                       | 2016                                    | 1.151 | 0.000 | 1.109 | 1.194 |
|                                       | 2017                                    | 1.199 | 0.000 | 1.155 | 1.244 |

|  |      |       |       |       |       |
|--|------|-------|-------|-------|-------|
|  | 2018 | 0.890 | 0.000 | 0.857 | 0.925 |
|  | 2019 | 0.707 | 0.000 | 0.673 | 0.743 |

696

697

698

699

700

701

702

703

704

705

706

707

708

709

710

711

712

713

714

715

716

717 Table A2: The association of outpatient hospital admissions with the socioeconomic and  
718 lifestyle covariates (N=140,466 surveys from 46,442 individuals)

|                         |                         | OR    | P-value | lower 95%CI | Upper 95% CI |
|-------------------------|-------------------------|-------|---------|-------------|--------------|
| <b>Ethnicity</b>        | British-white           | Ref   |         |             |              |
|                         | Other-white             | 0.985 | 0.753   | 0.894       | 1.084        |
|                         | Indian                  | 0.907 | 0.090   | 0.809       | 1.015        |
|                         | Pakistani/Bangladeshi   | 0.886 | 0.019   | 0.800       | 0.981        |
|                         | Black/African/Caribbean | 1.101 | 0.080   | 0.988       | 1.227        |
|                         | Mixed ethnicities       | 1.385 | 0.000   | 1.199       | 1.600        |
|                         | Other ethnicities       | 0.928 | 0.230   | 0.822       | 1.048        |
| <b>Country of birth</b> | Born in the UK          | Ref   |         |             |              |
|                         | Not born in the UK      | 0.893 | 0.003   | 0.828       | 0.963        |

|                                       |                                         |       |       |       |       |
|---------------------------------------|-----------------------------------------|-------|-------|-------|-------|
|                                       | No answer                               | 0.945 | 0.088 | 0.886 | 1.008 |
| <b>Age</b>                            | 16-18                                   | Ref   |       |       |       |
|                                       | 19-23                                   | 0.949 | 0.329 | 0.855 | 1.054 |
|                                       | 24-28                                   | 1.109 | 0.105 | 0.979 | 1.256 |
|                                       | 29-33                                   | 1.228 | 0.002 | 1.078 | 1.399 |
|                                       | 34-38                                   | 1.139 | 0.051 | 0.999 | 1.297 |
|                                       | 39-43                                   | 1.242 | 0.001 | 1.090 | 1.414 |
|                                       | 44-48                                   | 1.364 | 0.000 | 1.199 | 1.552 |
|                                       | 49-53                                   | 1.588 | 0.000 | 1.396 | 1.806 |
|                                       | 54-58                                   | 1.941 | 0.000 | 1.705 | 2.209 |
|                                       | 59-63                                   | 2.122 | 0.000 | 1.860 | 2.420 |
|                                       | 64-68                                   | 2.287 | 0.000 | 2.000 | 2.616 |
|                                       | 69-73                                   | 2.588 | 0.000 | 2.257 | 2.968 |
|                                       | 74-78                                   | 3.291 | 0.000 | 2.851 | 3.800 |
|                                       | >78                                     | 3.811 | 0.000 | 3.287 | 4.418 |
| <b>Gender</b>                         | Male                                    | Ref   |       |       |       |
|                                       | Female                                  | 1.458 | 0.000 | 1.401 | 1.517 |
| <b>Education</b>                      | University degree                       | Ref   |       |       |       |
|                                       | High school degree                      | 1.002 | 0.944 | 0.950 | 1.057 |
|                                       | Lower educational levels                | 1.061 | 0.547 | 0.874 | 1.289 |
|                                       | Other qualifications                    | 0.989 | 0.708 | 0.931 | 1.049 |
|                                       | Still a student                         | 0.660 | 0.000 | 0.597 | 0.729 |
| <b>Marital status</b>                 | Married                                 | Ref   |       |       |       |
|                                       | Living as a couple                      | 1.001 | 0.985 | 0.938 | 1.068 |
|                                       | Widowed                                 | 0.955 | 0.296 | 0.877 | 1.041 |
|                                       | Divorced/separated                      | 1.231 | 0.000 | 1.148 | 1.319 |
|                                       | Single never married                    | 0.904 | 0.001 | 0.850 | 0.961 |
|                                       | No answer                               | 0.836 | 0.180 | 0.643 | 1.087 |
| <b>Subjective financial situation</b> | Living comfortably/doing alright        | Ref   |       |       |       |
|                                       | Living difficultly                      | 1.303 | 0.000 | 1.258 | 1.350 |
|                                       | No answer                               | 1.227 | 0.104 | 0.959 | 1.569 |
| <b>Socio-economic classification</b>  | Management and professional occupations | Ref   |       |       |       |
|                                       | Intermediate occupations                | 0.935 | 0.033 | 0.879 | 0.995 |
|                                       | Routine occupations                     | 0.993 | 0.805 | 0.936 | 1.053 |
|                                       | NA: student/retired/not working         | 1.669 | 0.000 | 1.580 | 1.763 |
|                                       | No answer                               | 1.052 | 0.424 | 0.929 | 1.191 |
| <b>Smoking status</b>                 | Non smoker                              | Ref   |       |       |       |
|                                       | Smoker                                  | 1.001 | 0.973 | 0.950 | 1.054 |
|                                       | No answer                               | 0.743 | 0.120 | 0.511 | 1.080 |
| <b>Time dummies</b>                   | 2015                                    | Ref   |       |       |       |
|                                       | 2016                                    | 1.094 | 0.000 | 1.051 | 1.138 |
|                                       | 2017                                    | 1.156 | 0.000 | 1.110 | 1.203 |
|                                       | 2018                                    | 1.052 | 0.015 | 1.010 | 1.096 |
|                                       | 2019                                    | 1.000 | 0.989 | 0.948 | 1.054 |

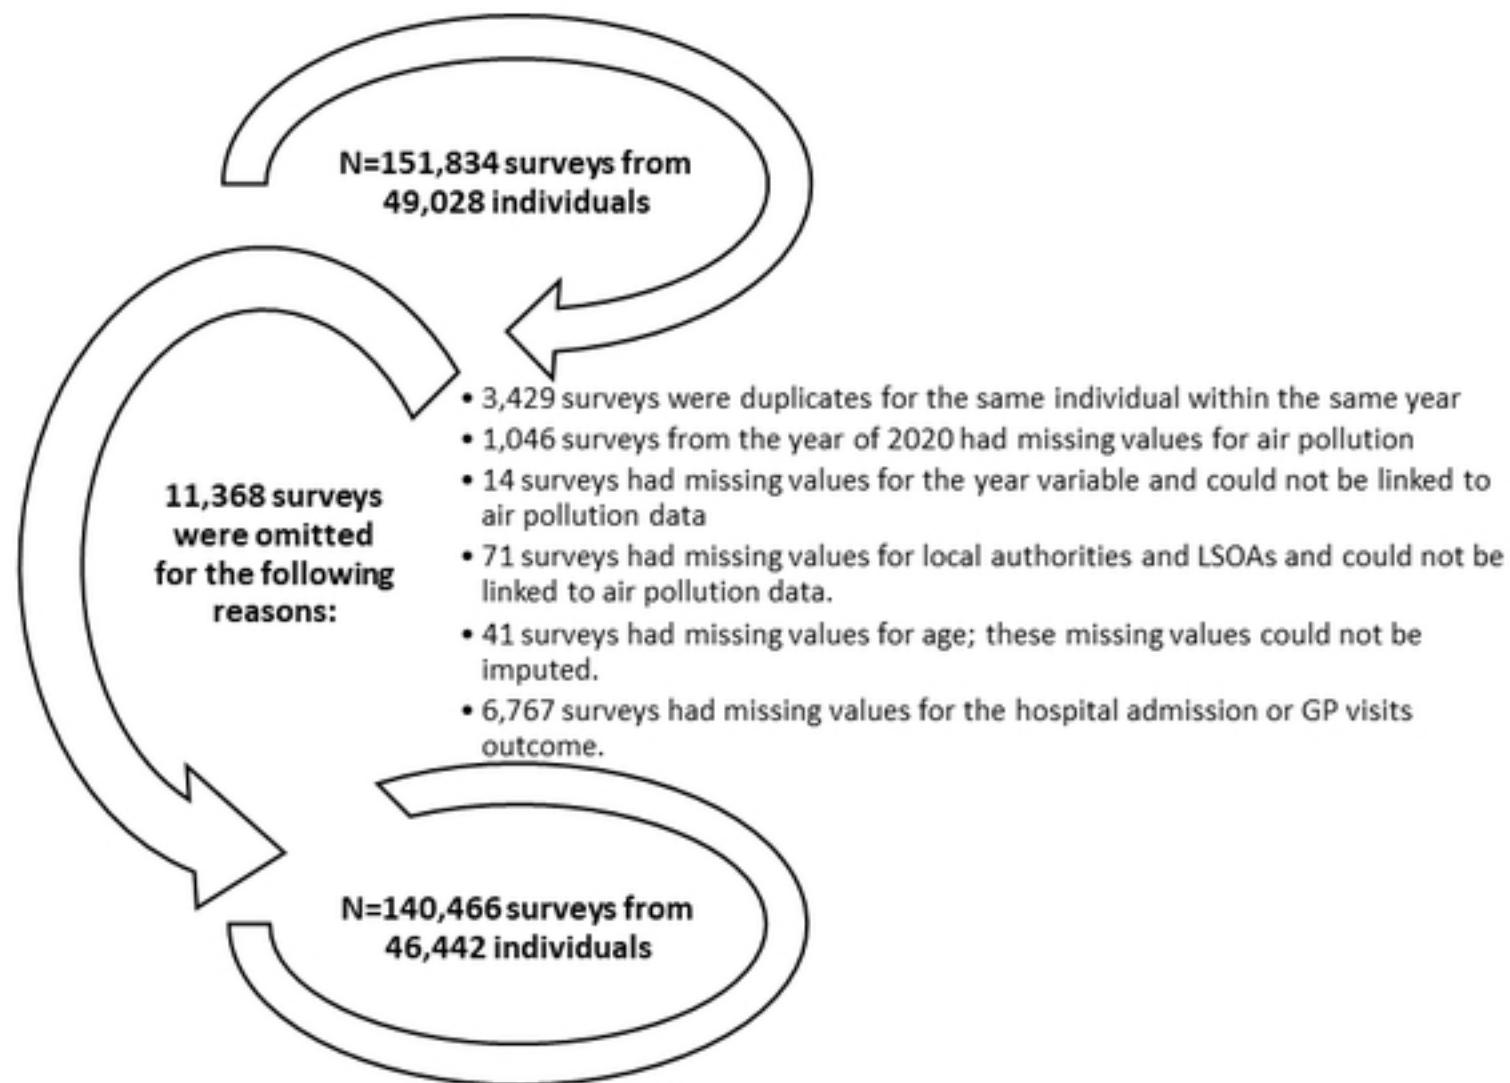

Figure

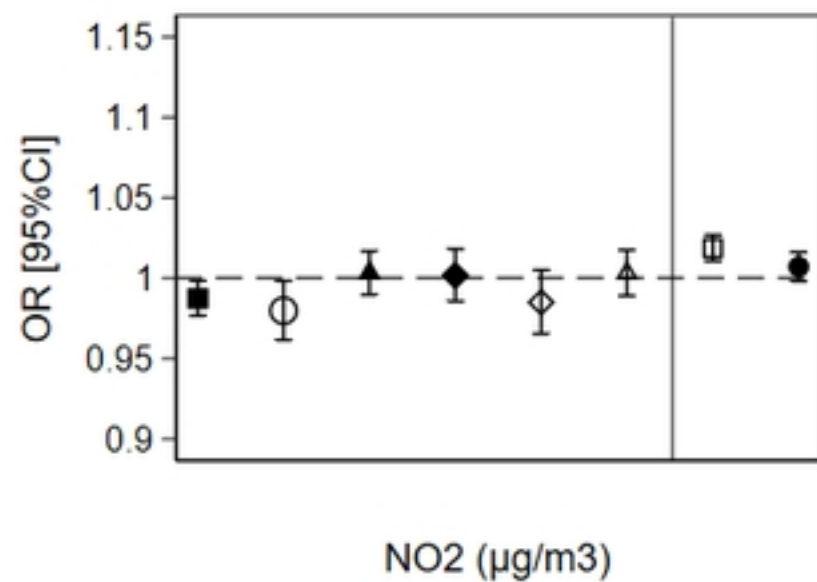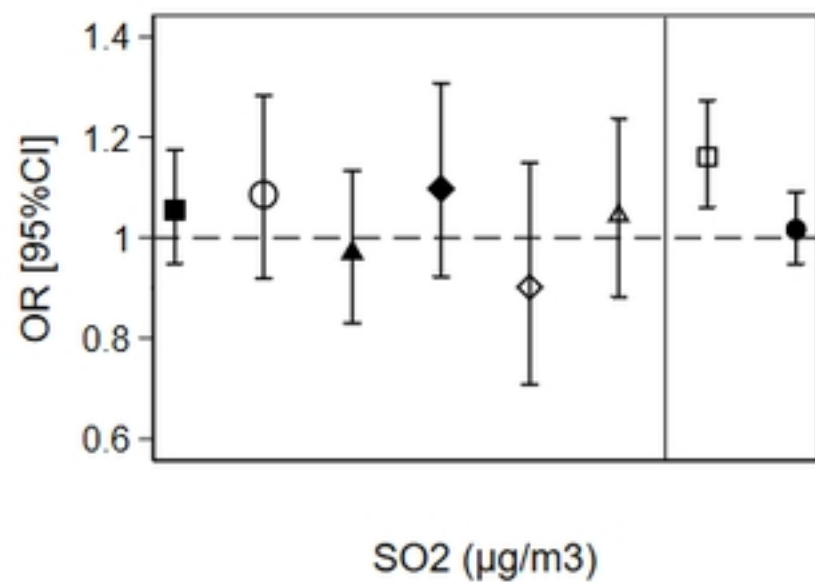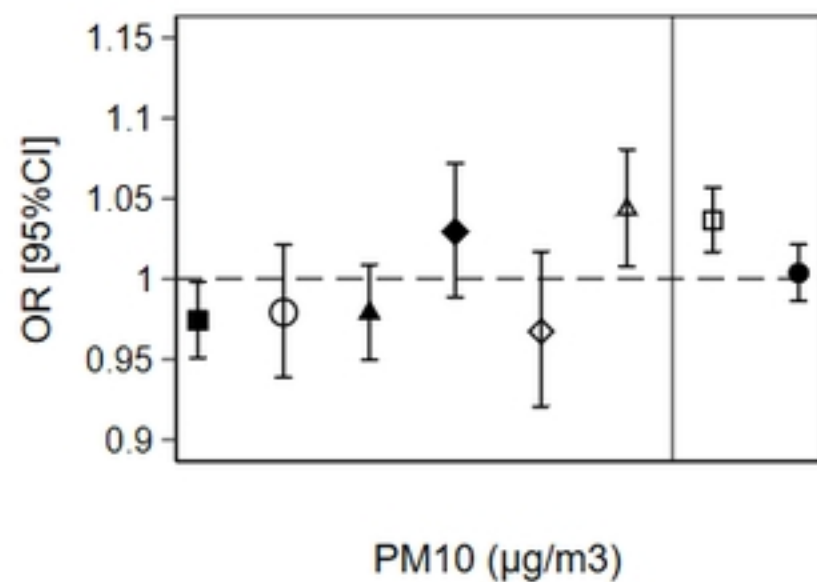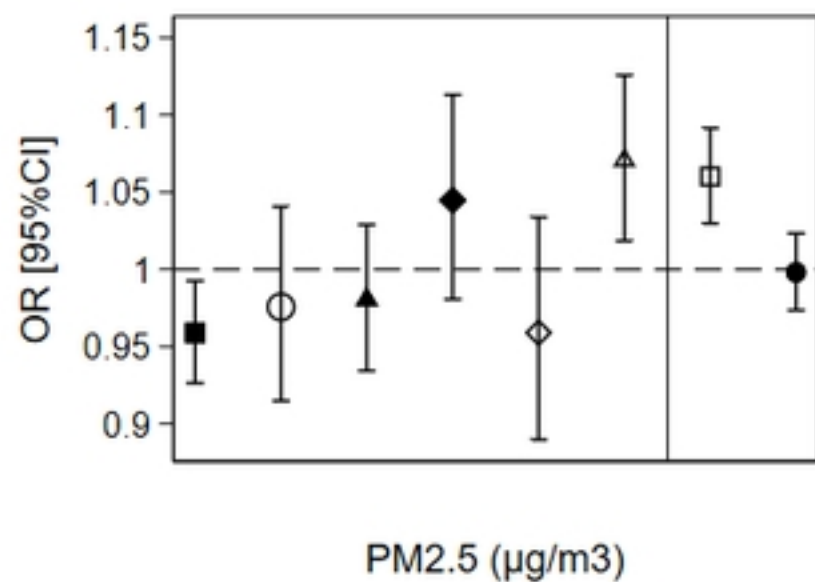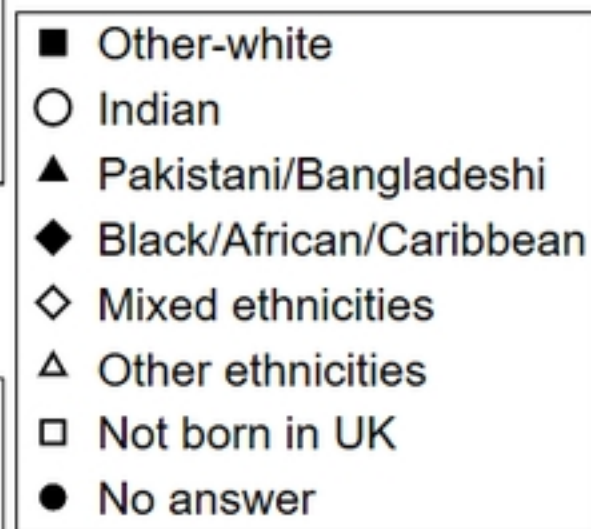

Figure

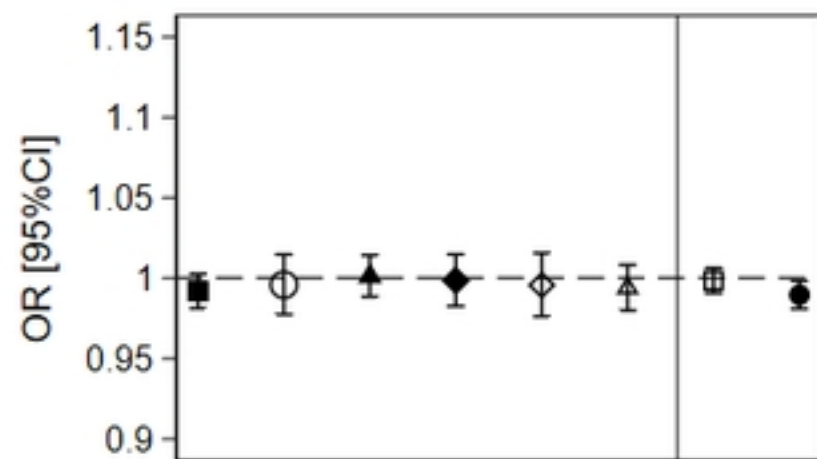

NO2 ( $\mu\text{g}/\text{m}^3$ )

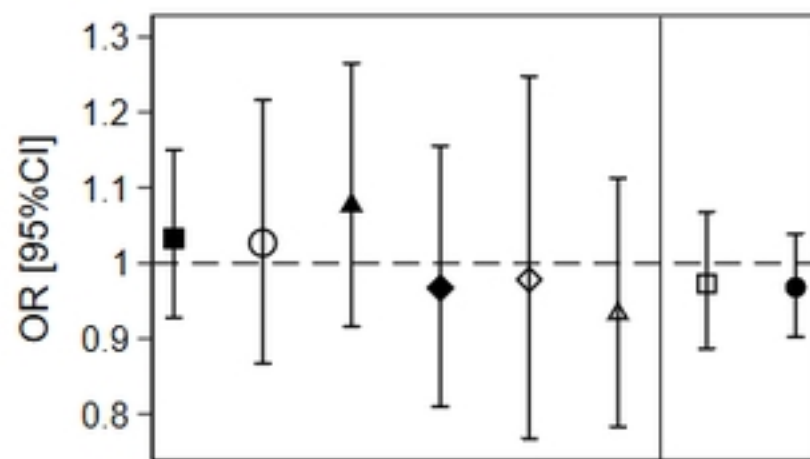

SO2 ( $\mu\text{g}/\text{m}^3$ )

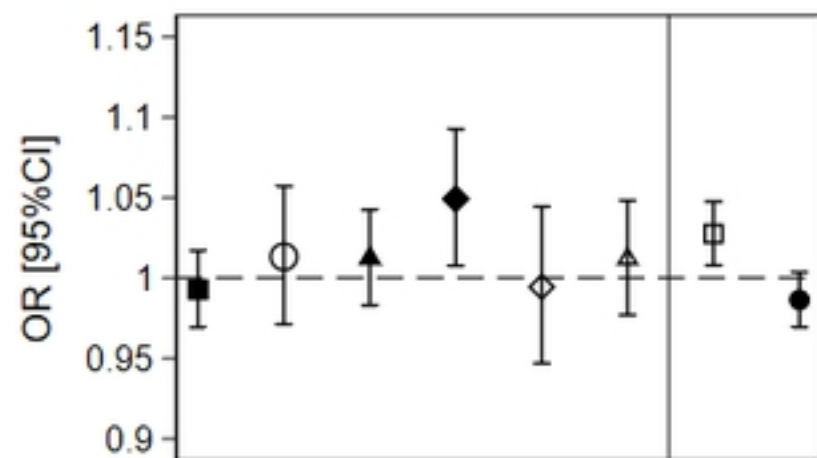

PM10 ( $\mu\text{g}/\text{m}^3$ )

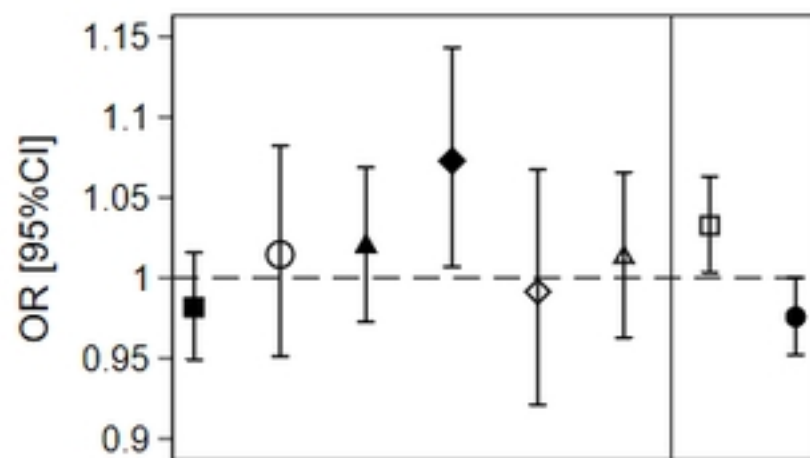

PM2.5 ( $\mu\text{g}/\text{m}^3$ )

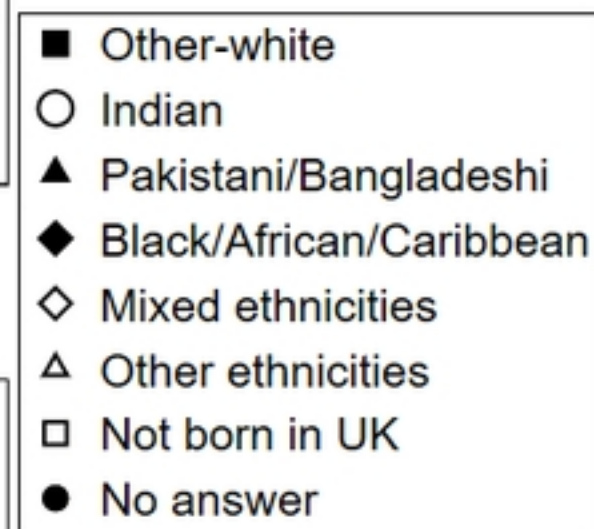

Figure

**a) Between**

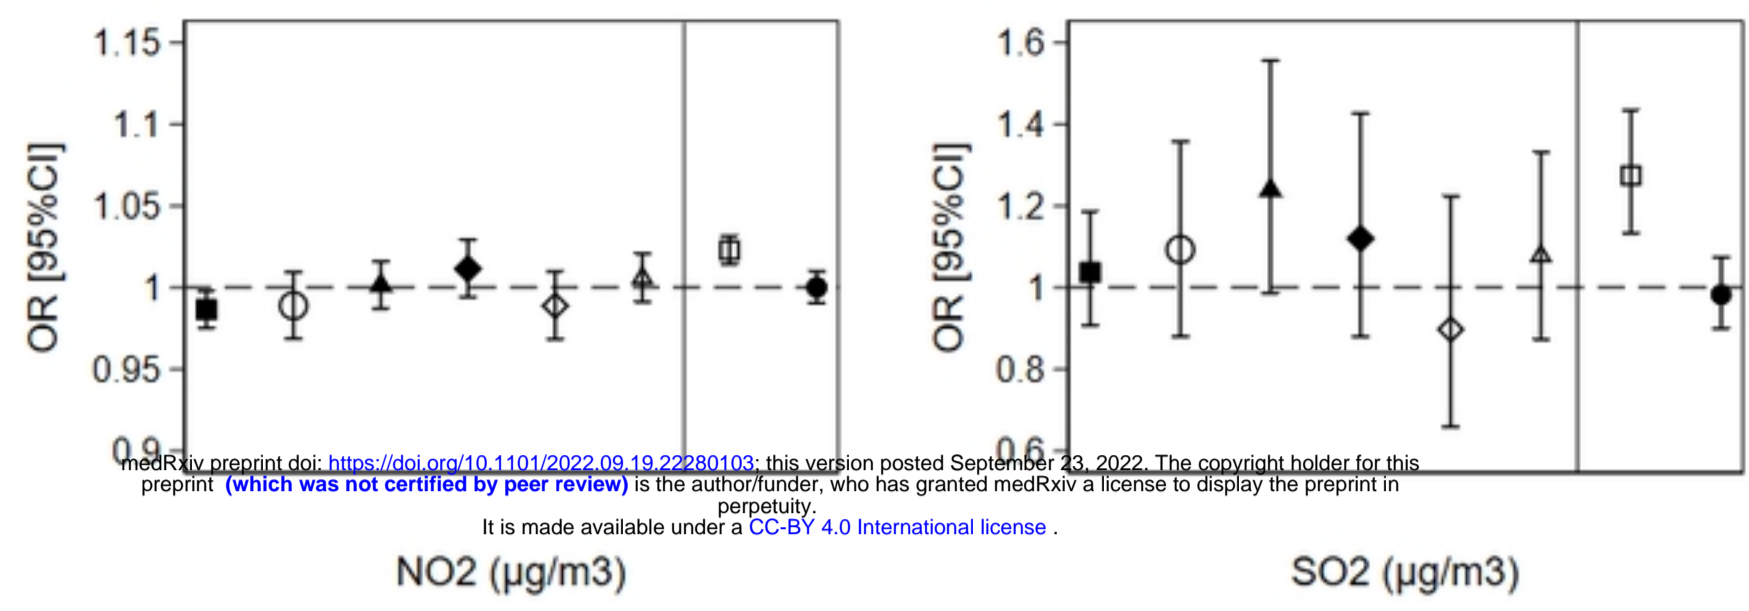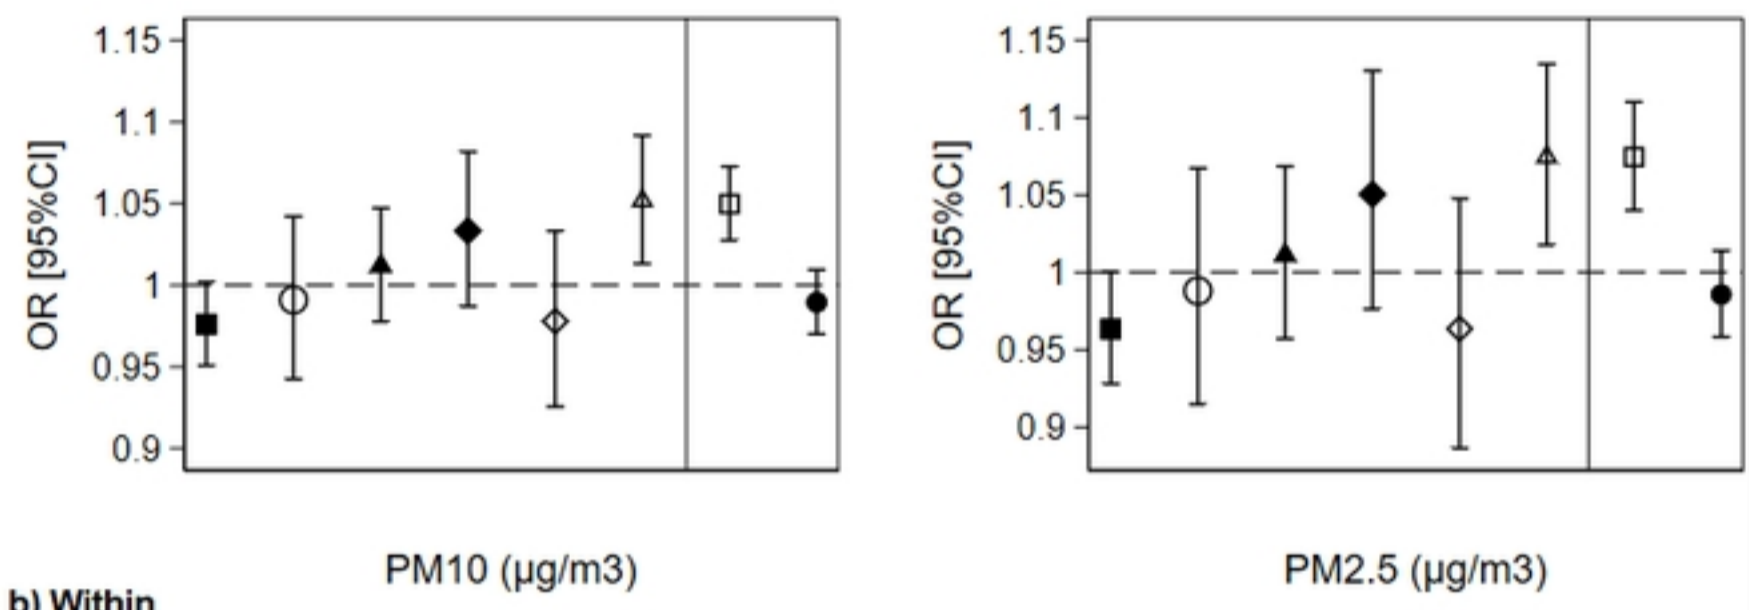

- Other-white
- Indian
- ▲ Pakistani/Bangladeshi
- ◆ Black/African/Caribbean
- ◇ Mixed ethnicities
- △ Other ethnicities
- Not born in UK
- No answer

**b) Within**

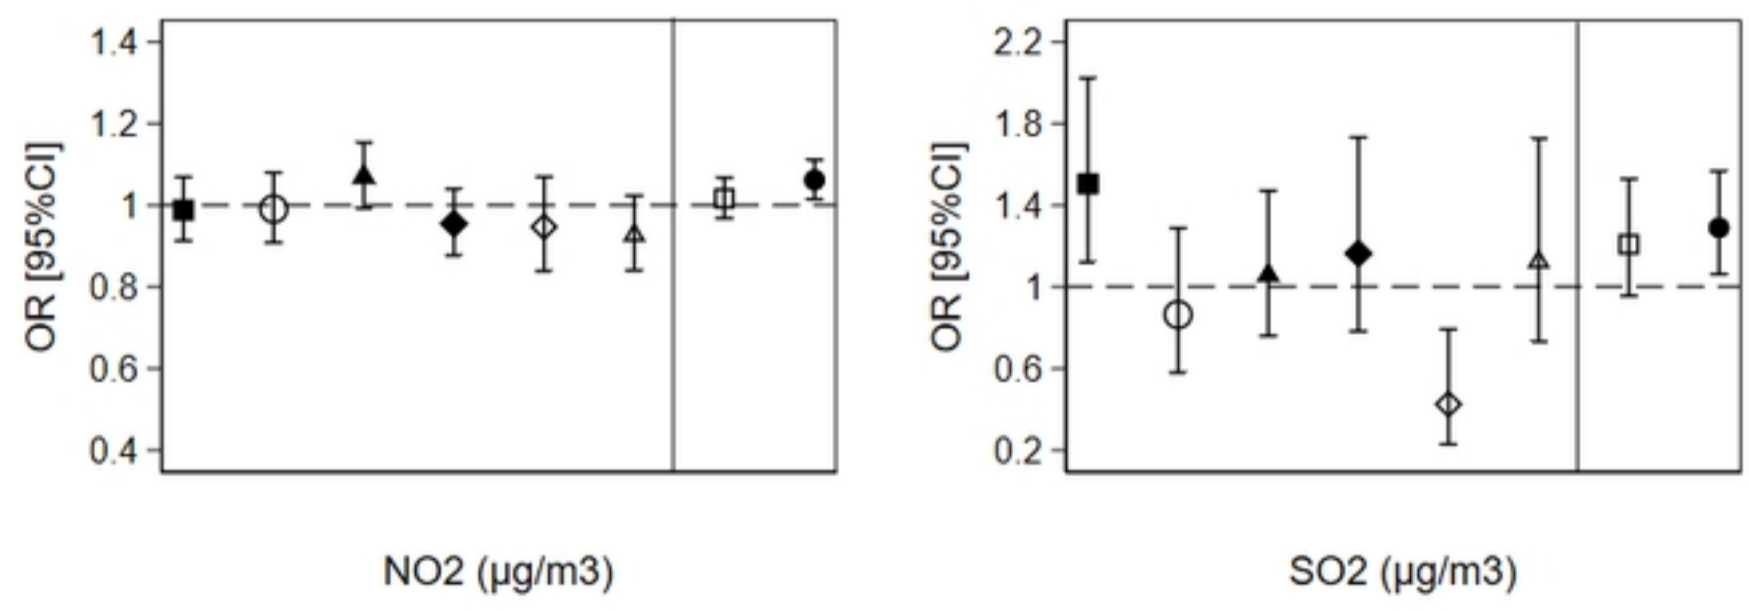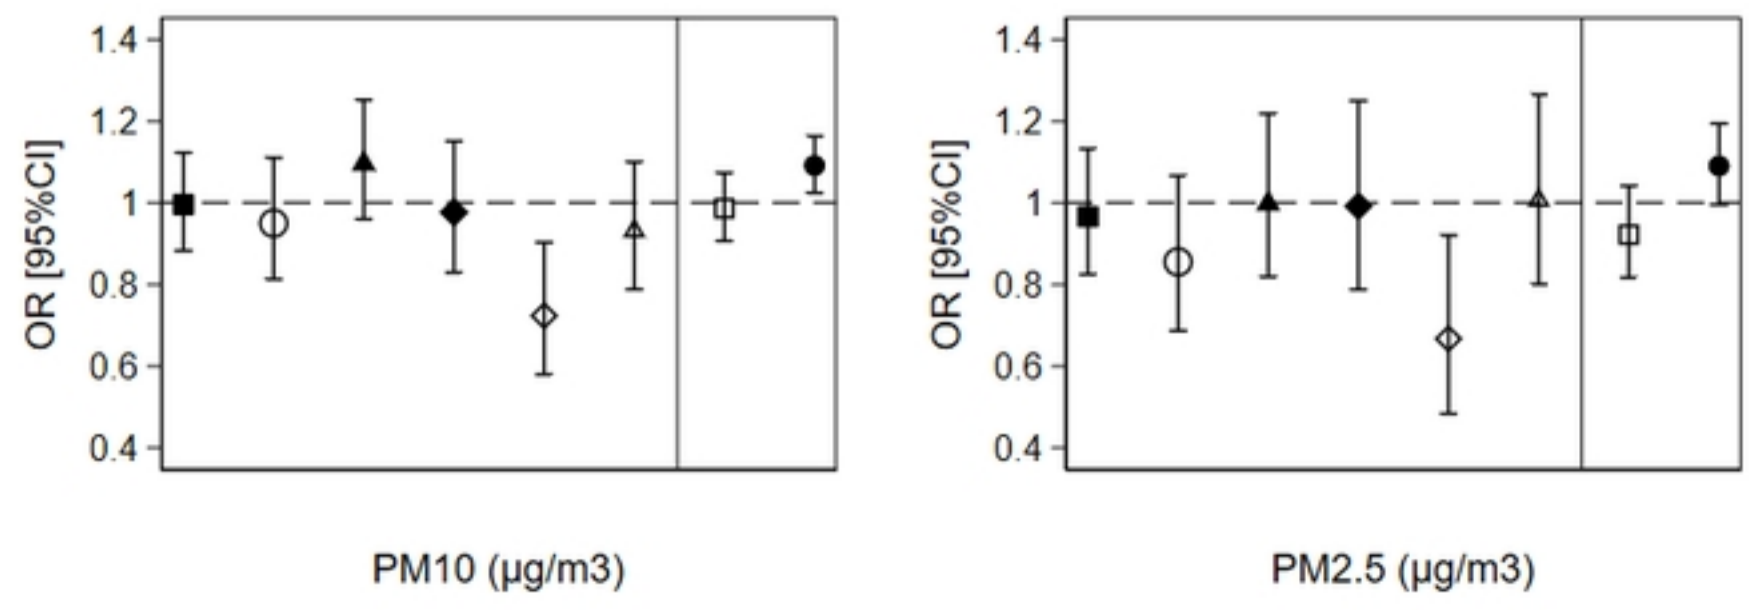

**Figure**



**a) Between**

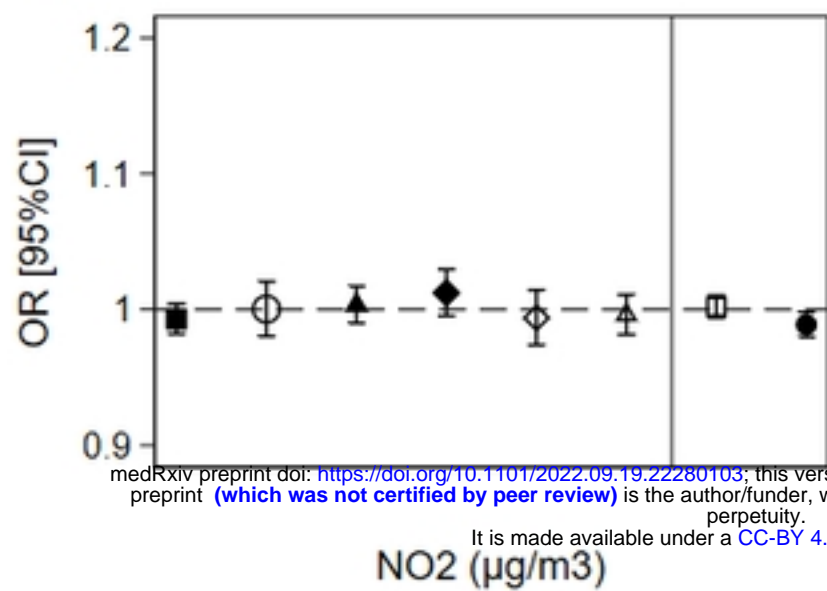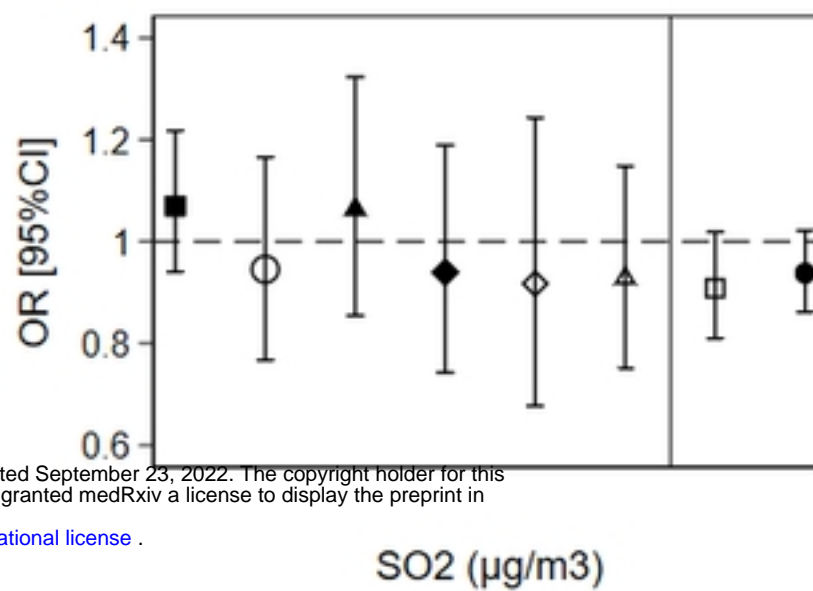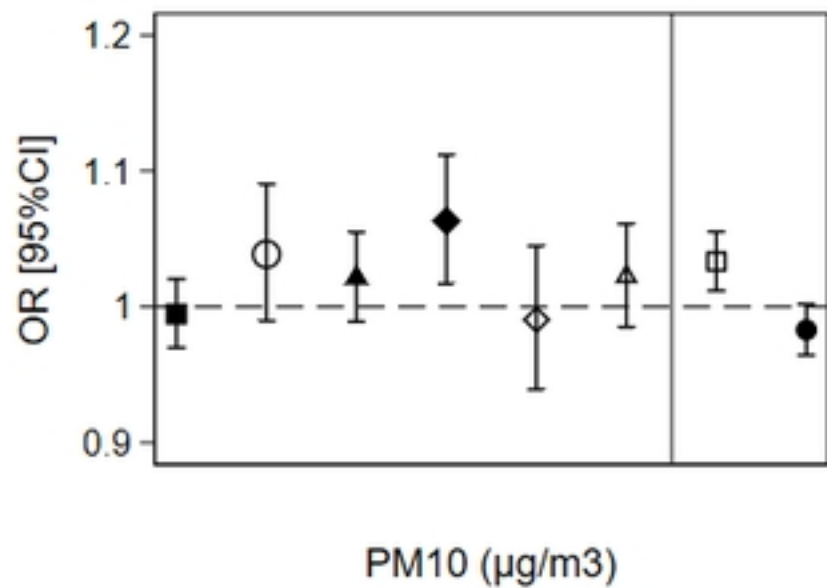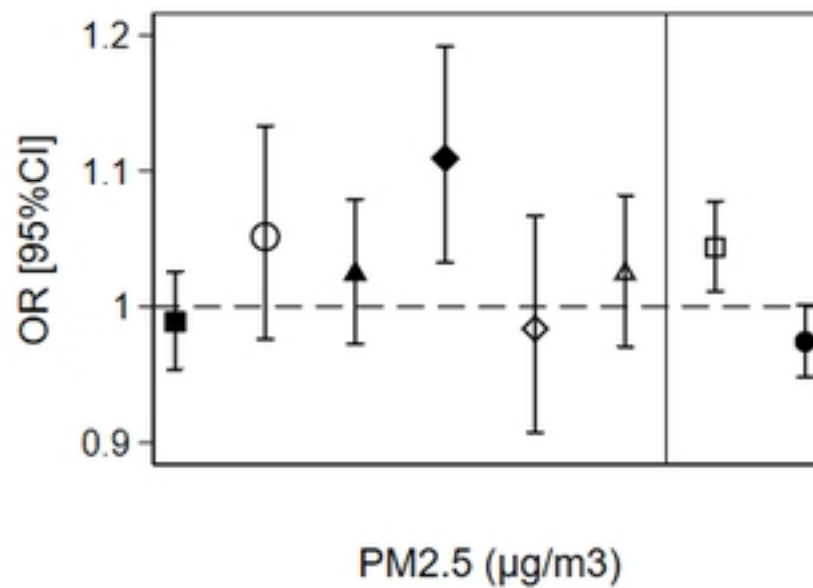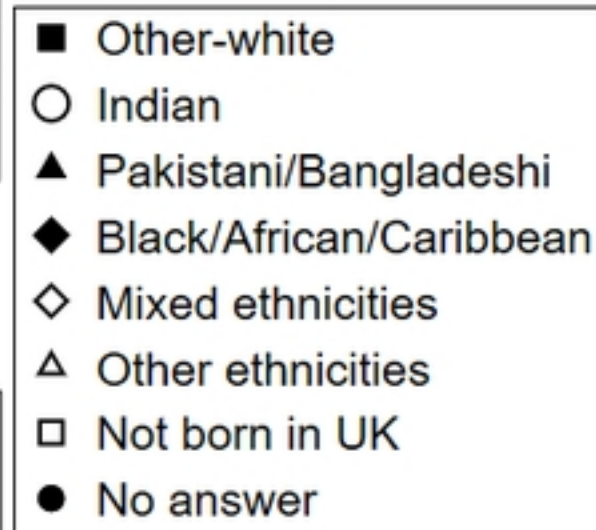

**b) Within**

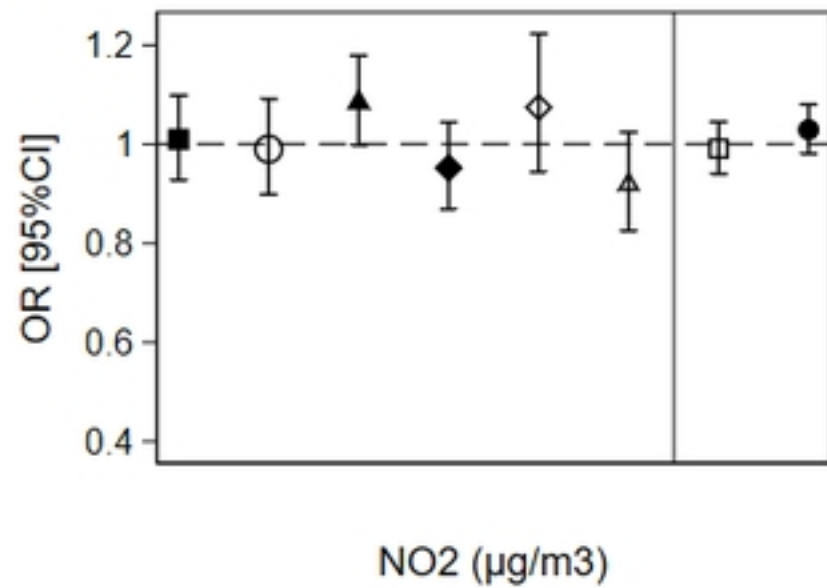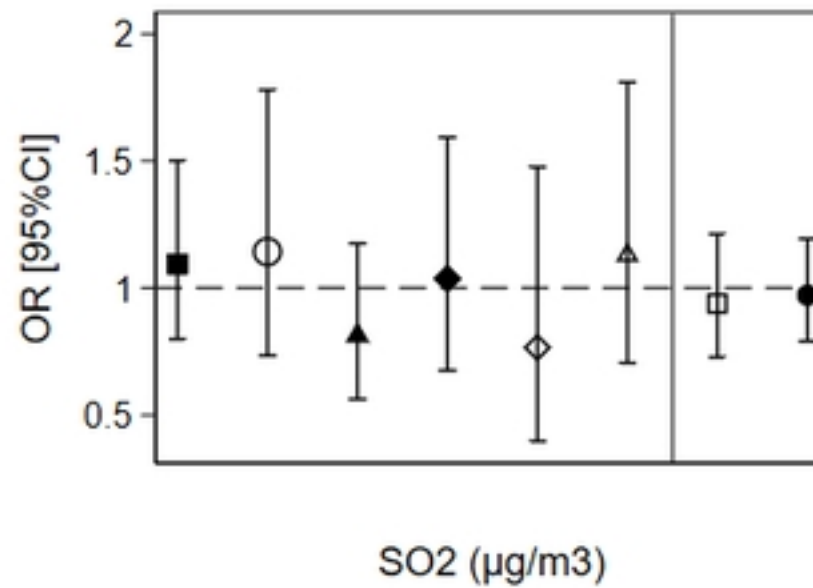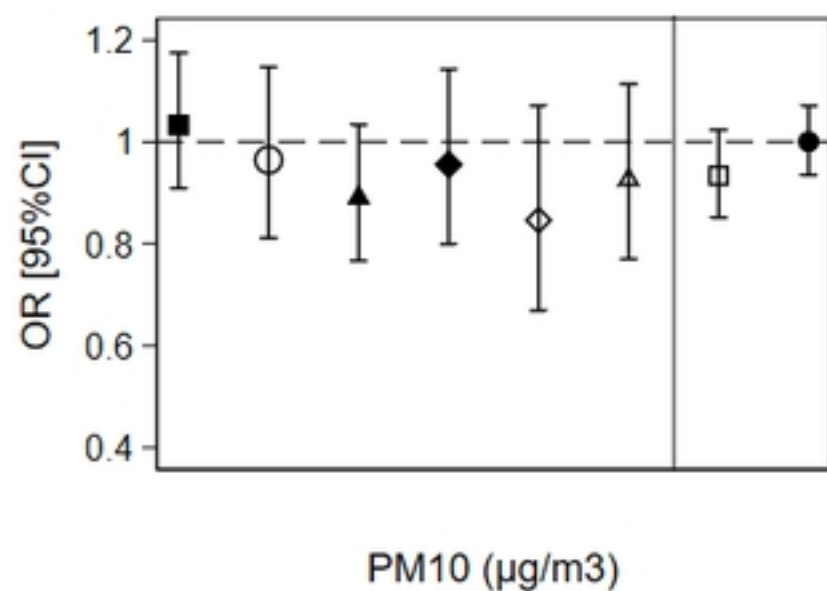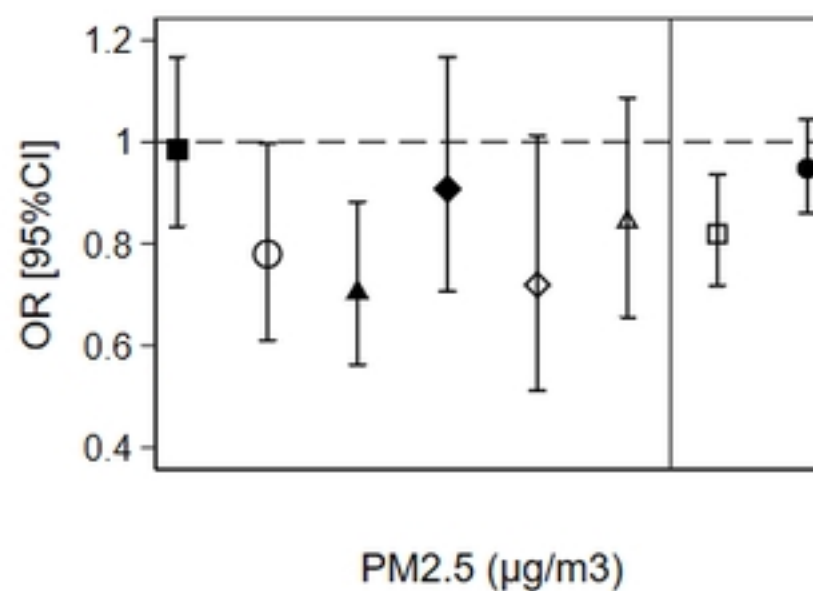

Figure
